# Supplementary material
Source: PubMed Central journal article supplement (PMC8799691)

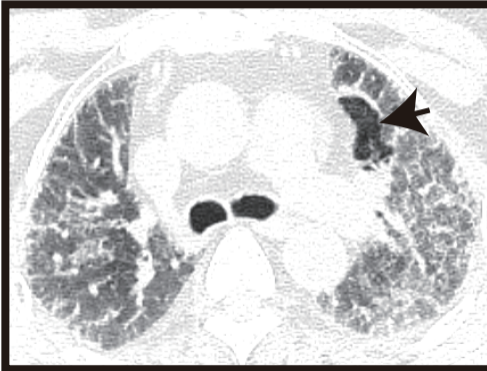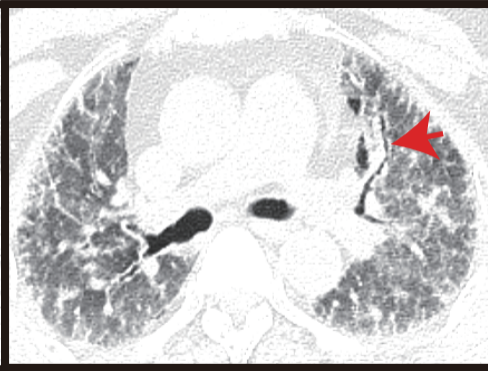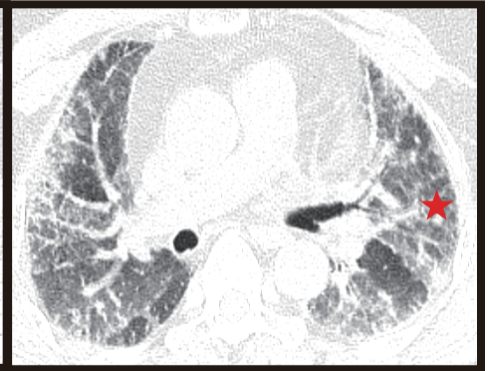

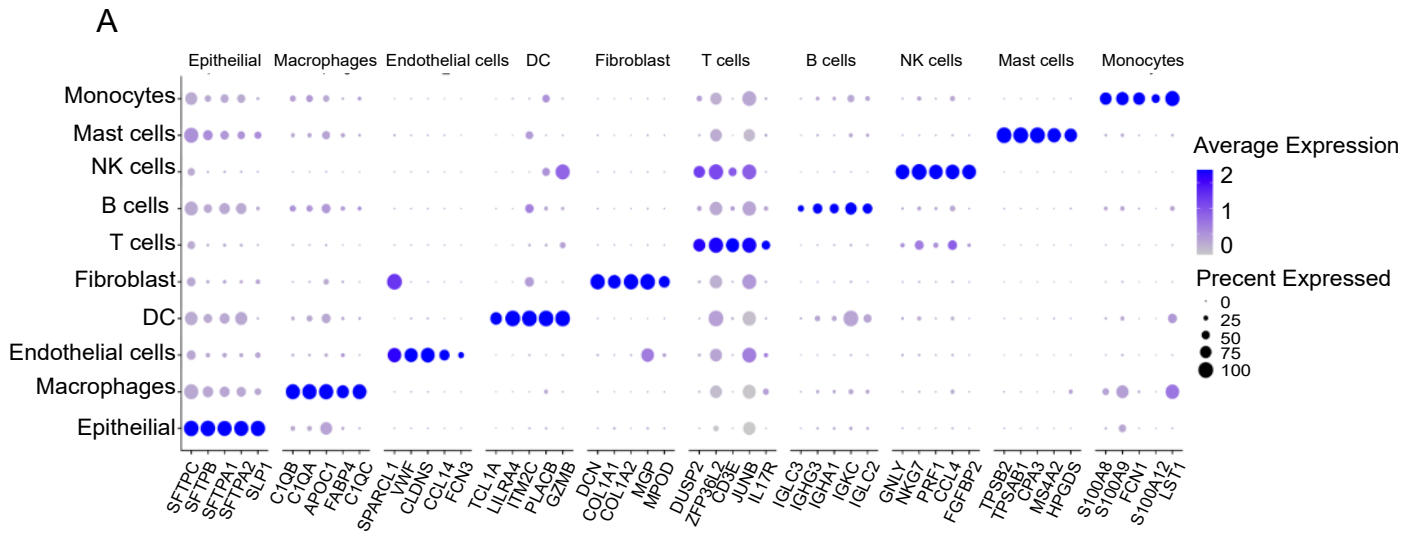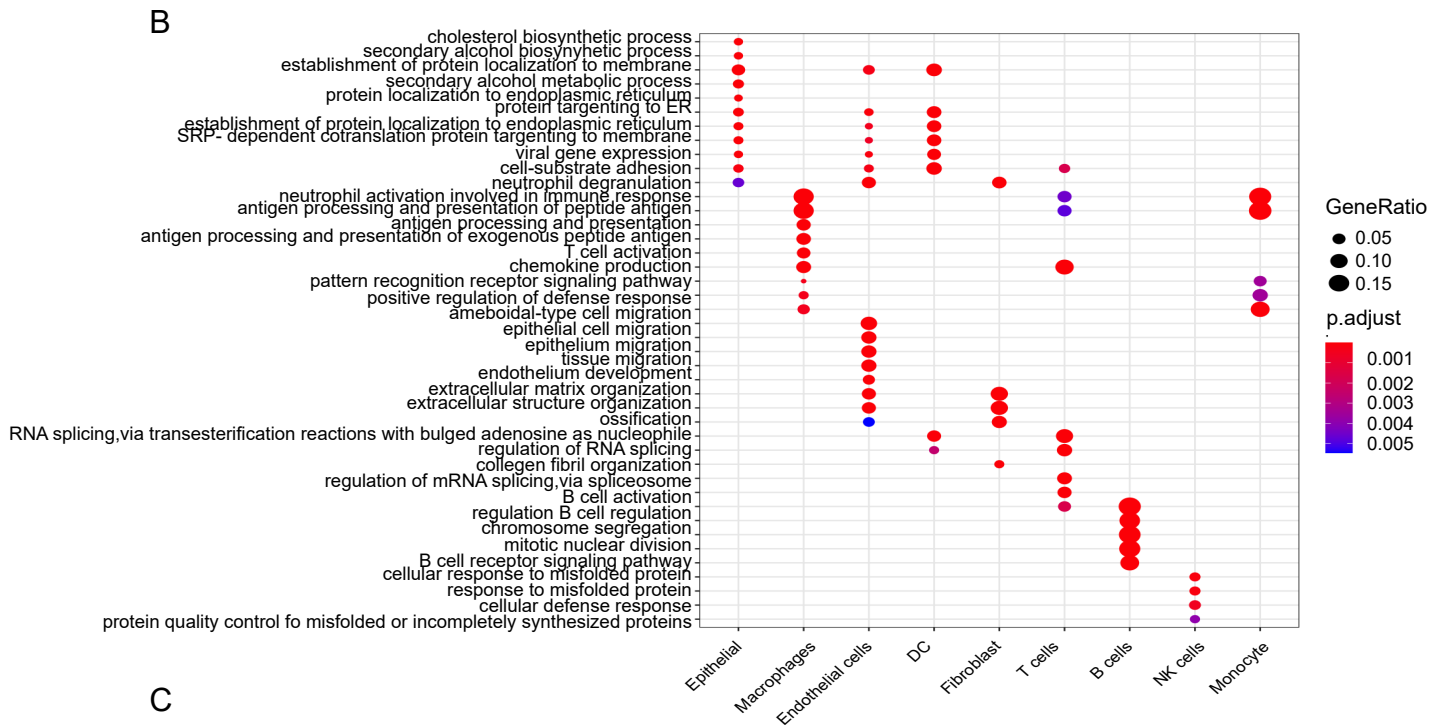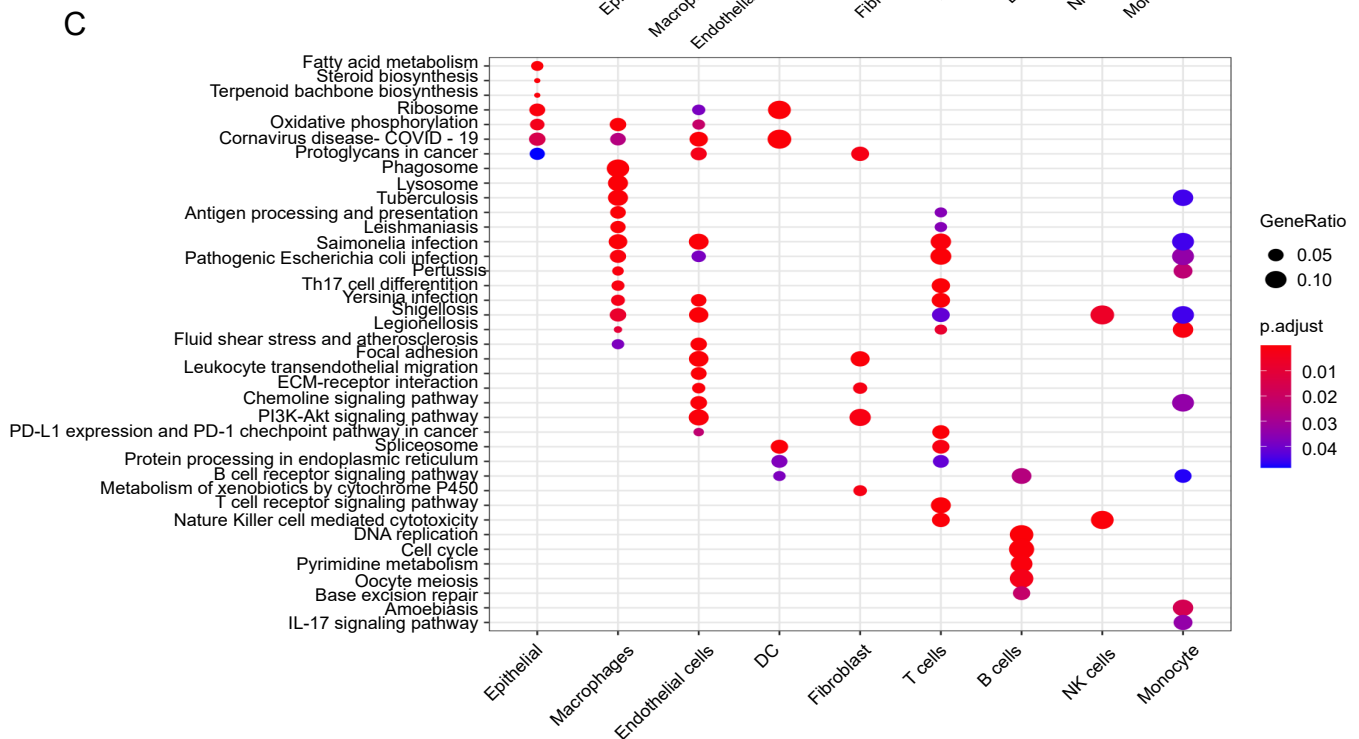

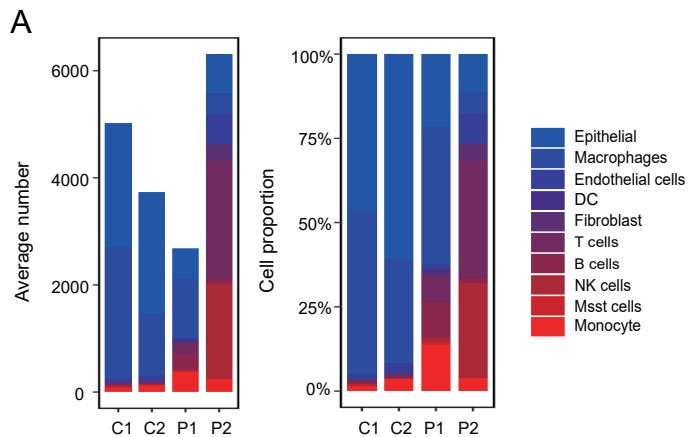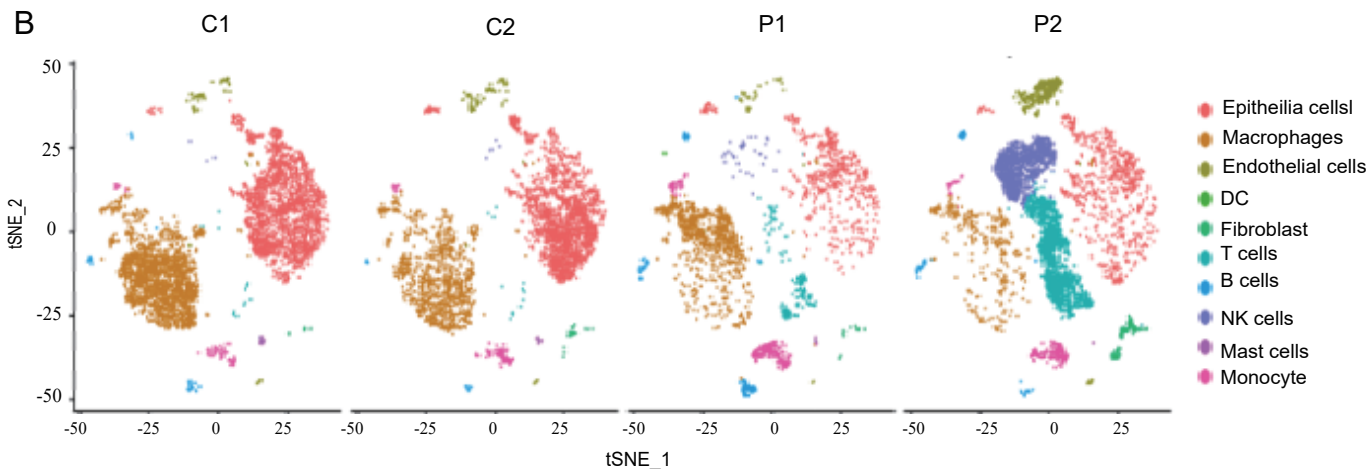

A

## Inflammatory Response Signature

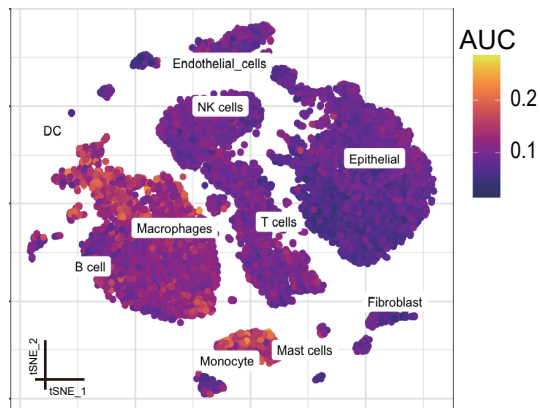

B

## Cytokine Signature

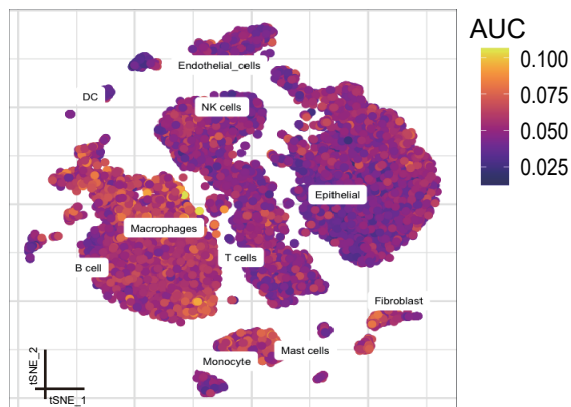

C

## Inflammatory Response Signature

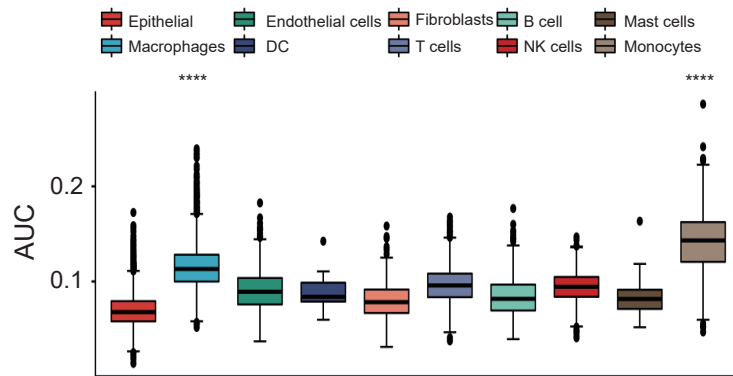

D

## Cytokine Signature

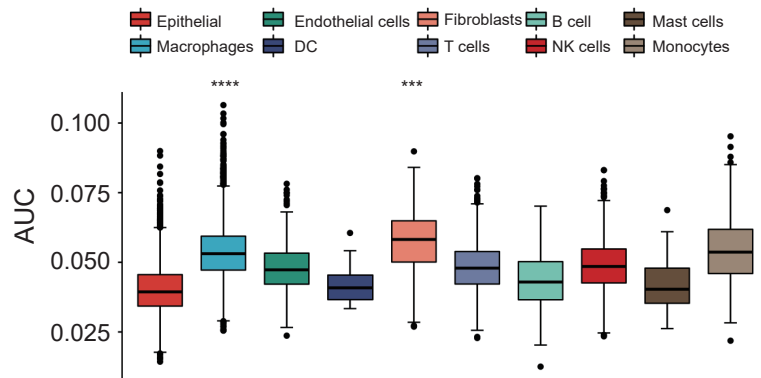

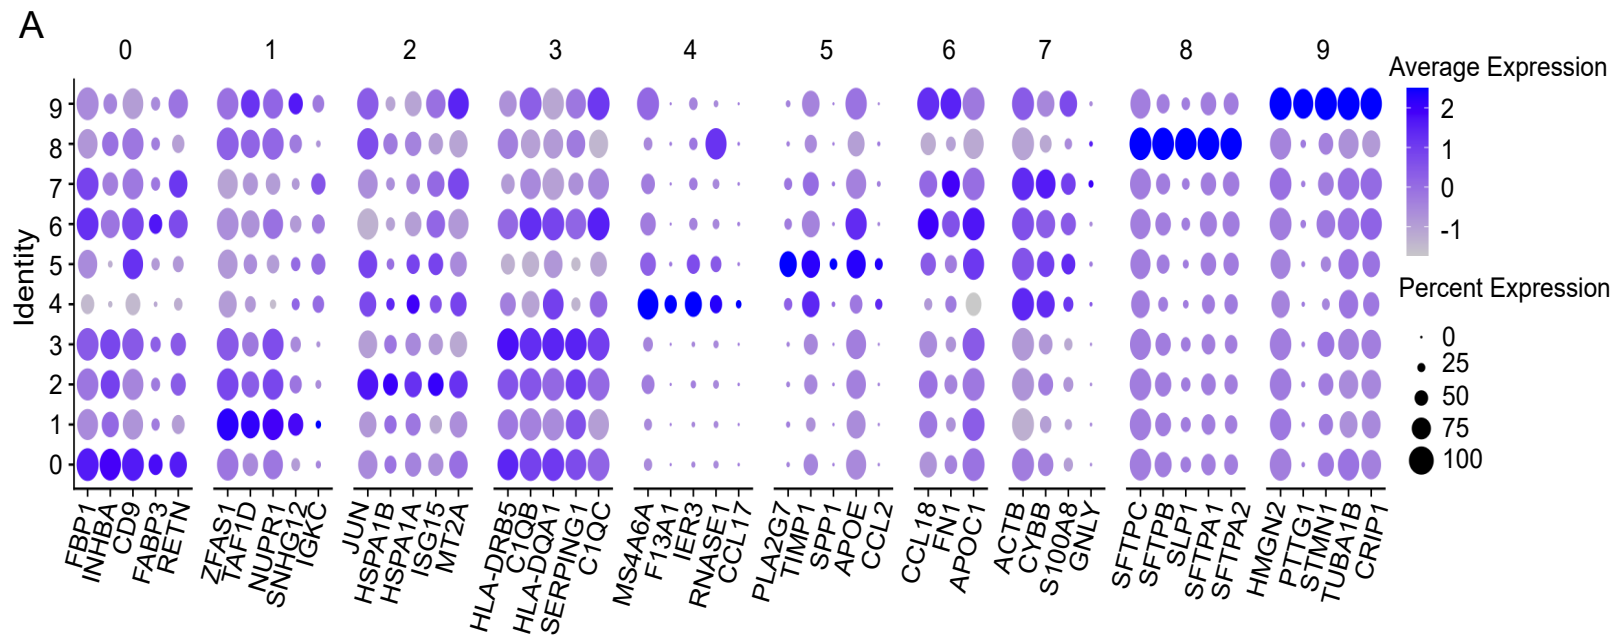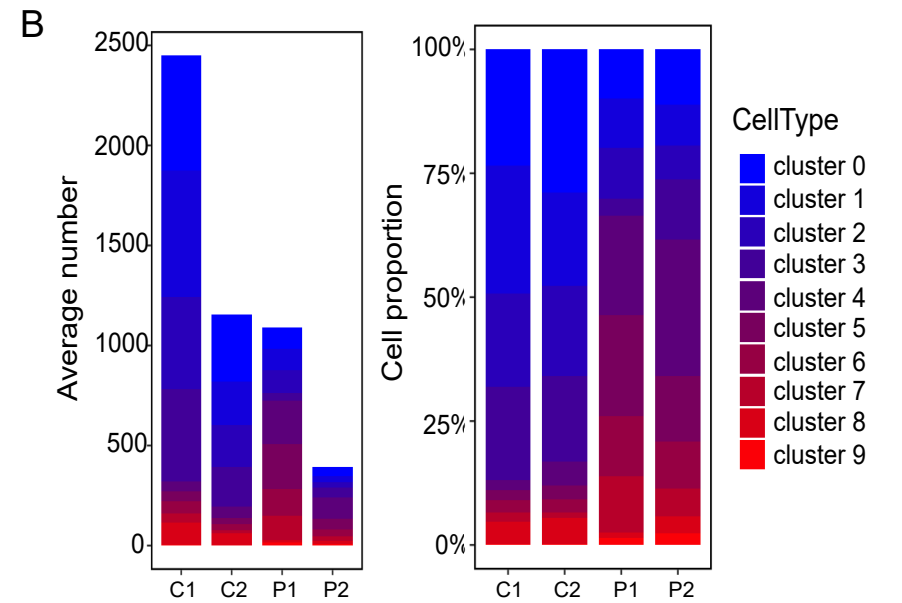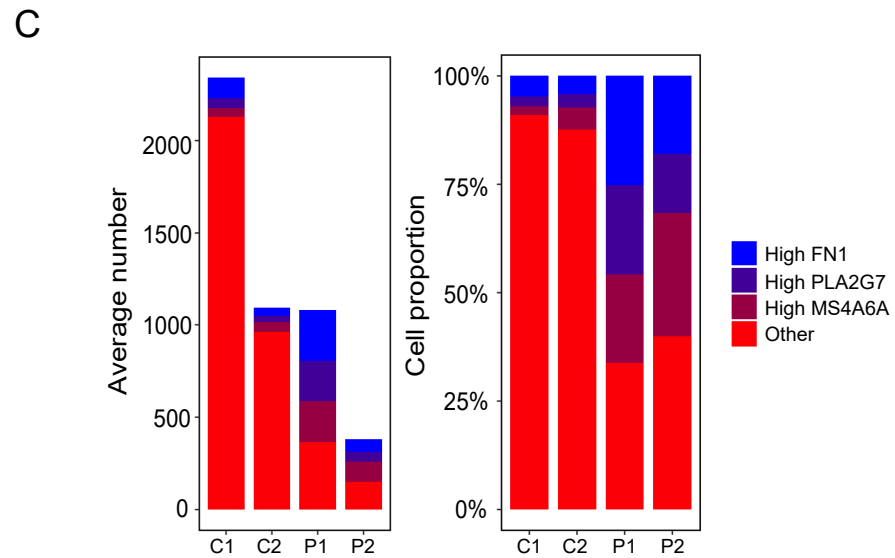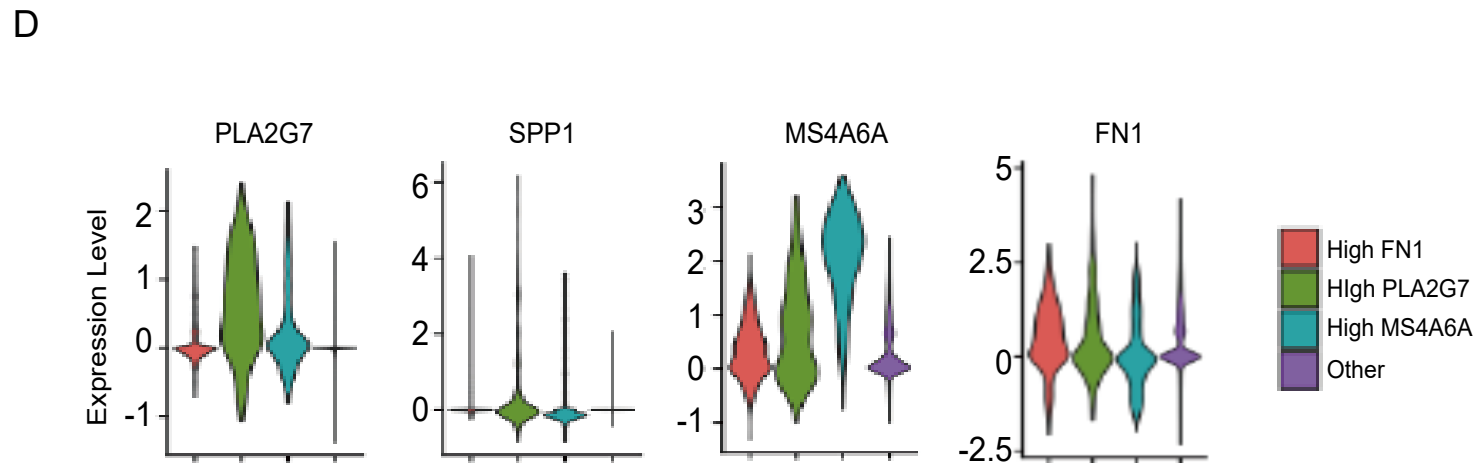

A

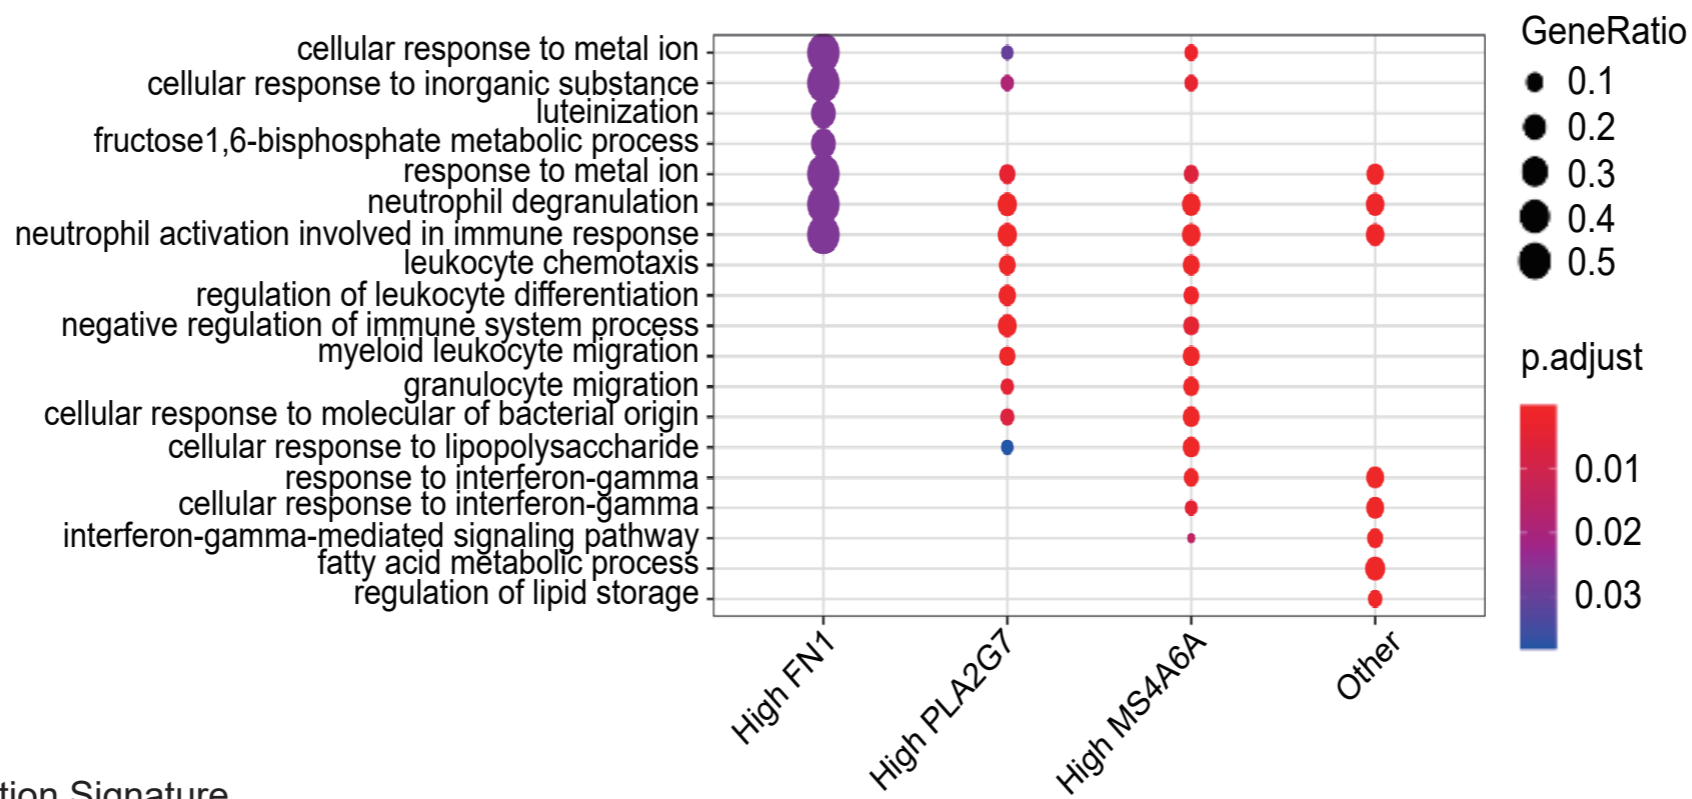

B Para-inflammation Signature

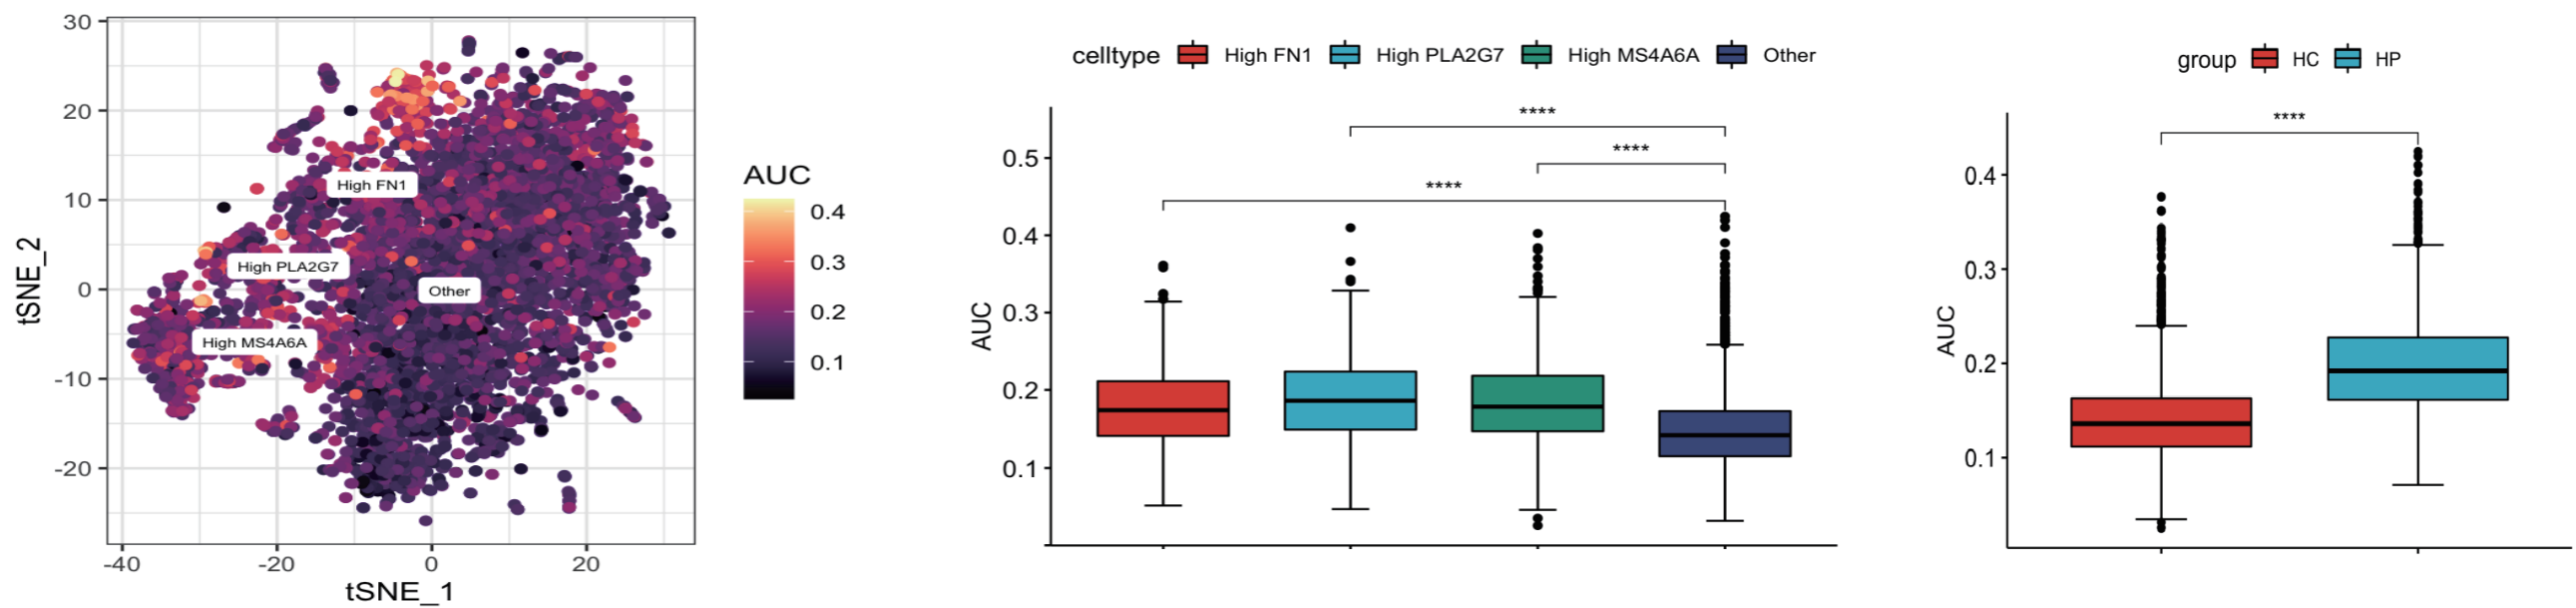

C

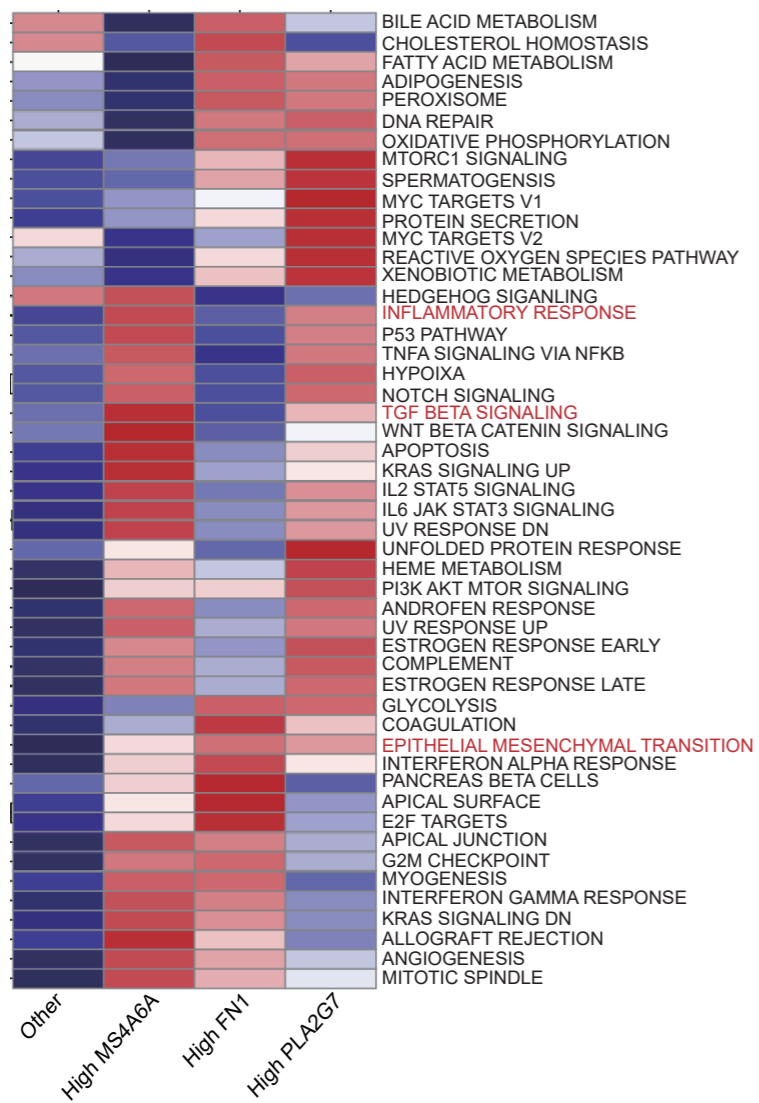

D

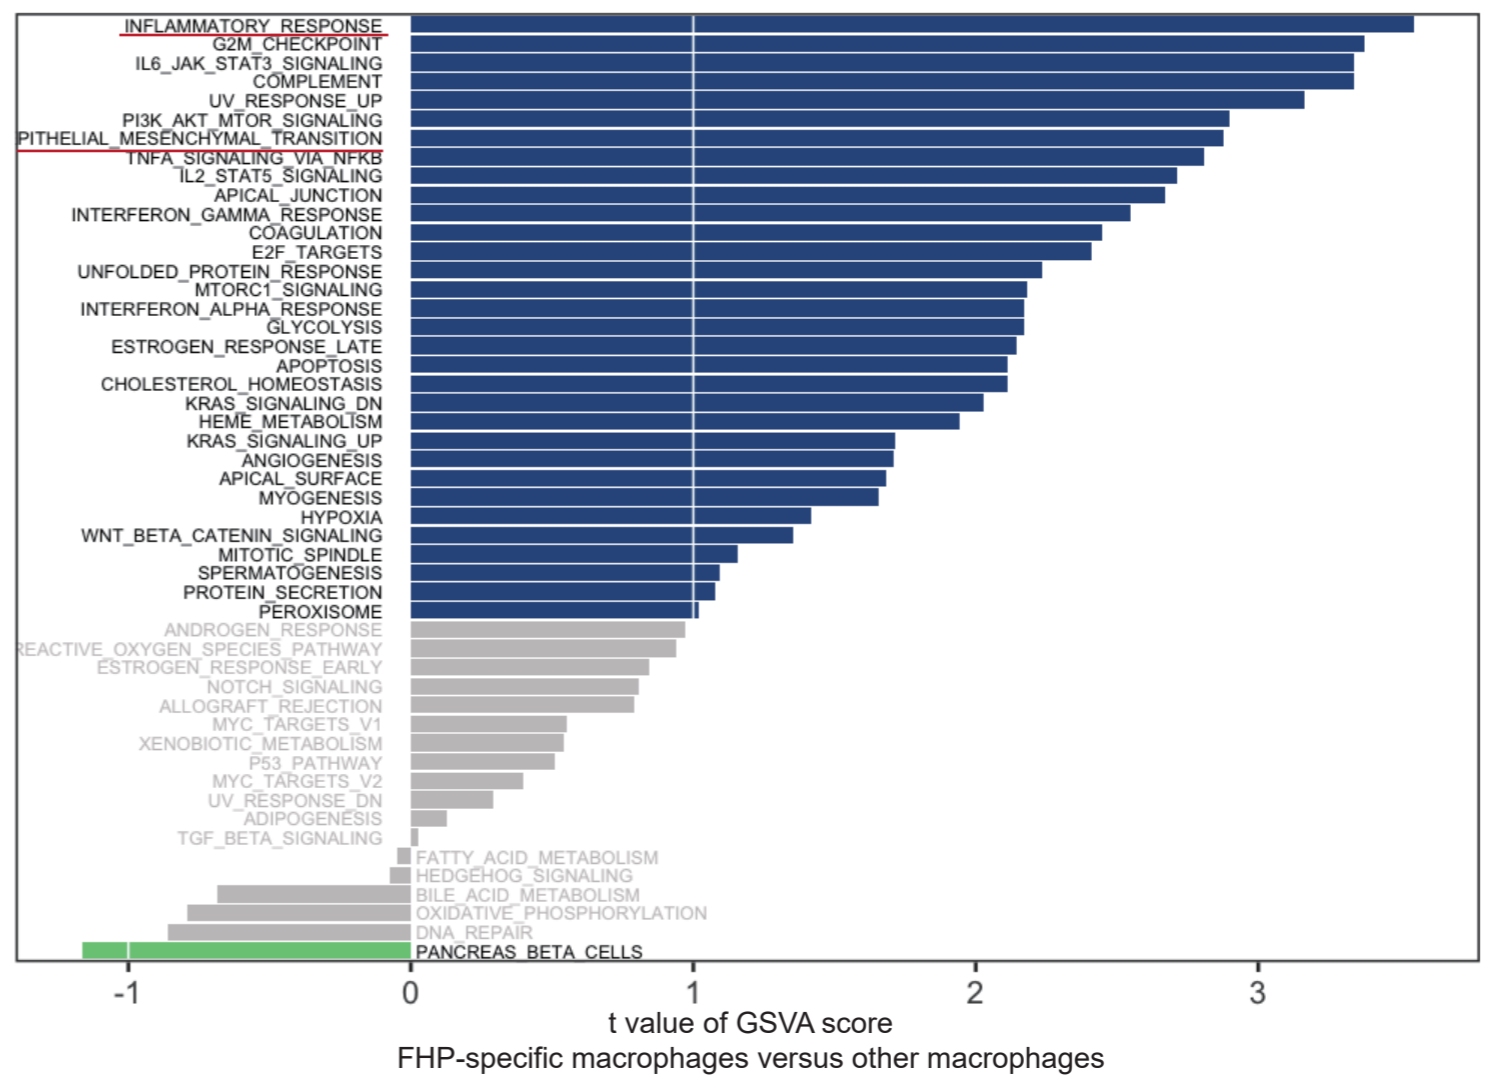

A

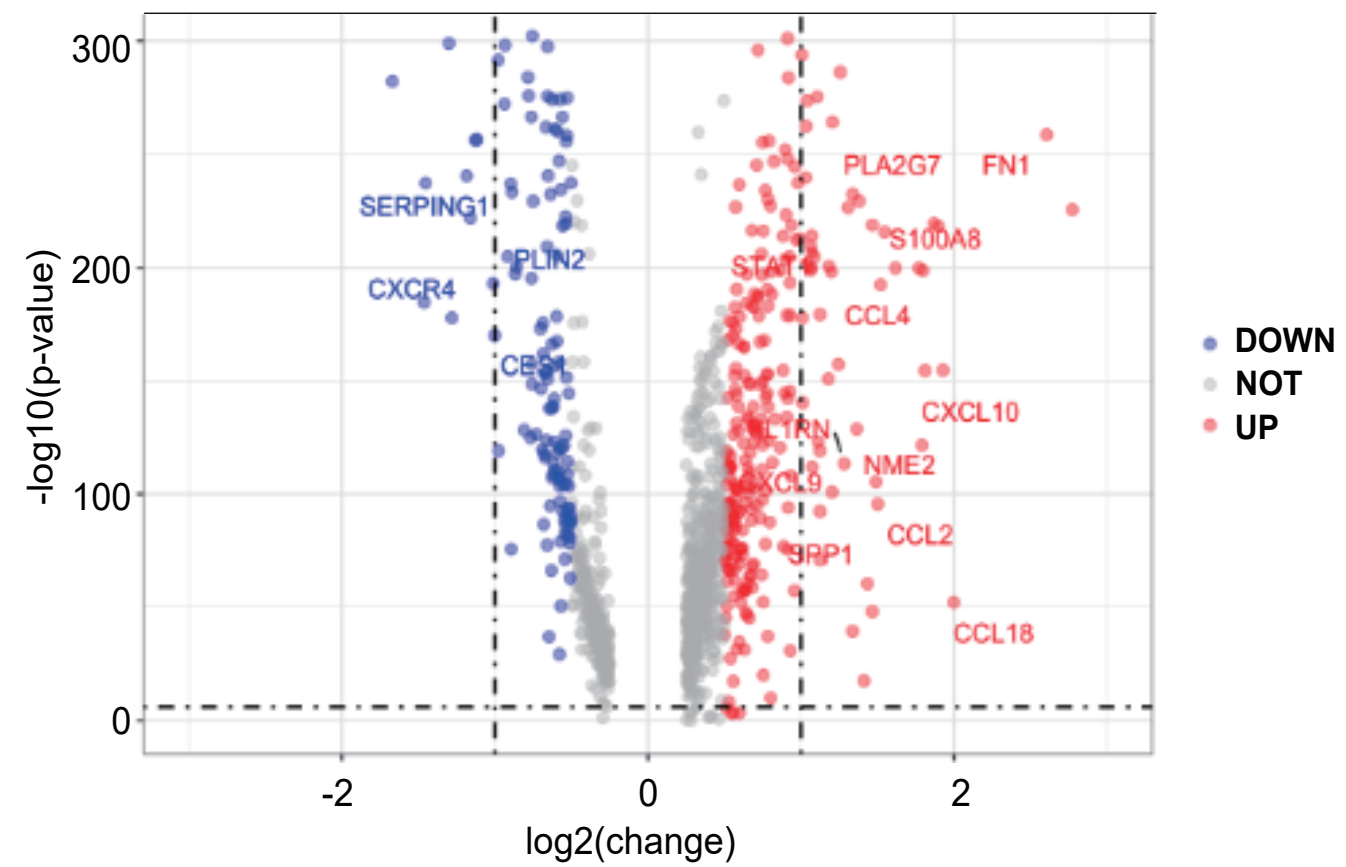

B

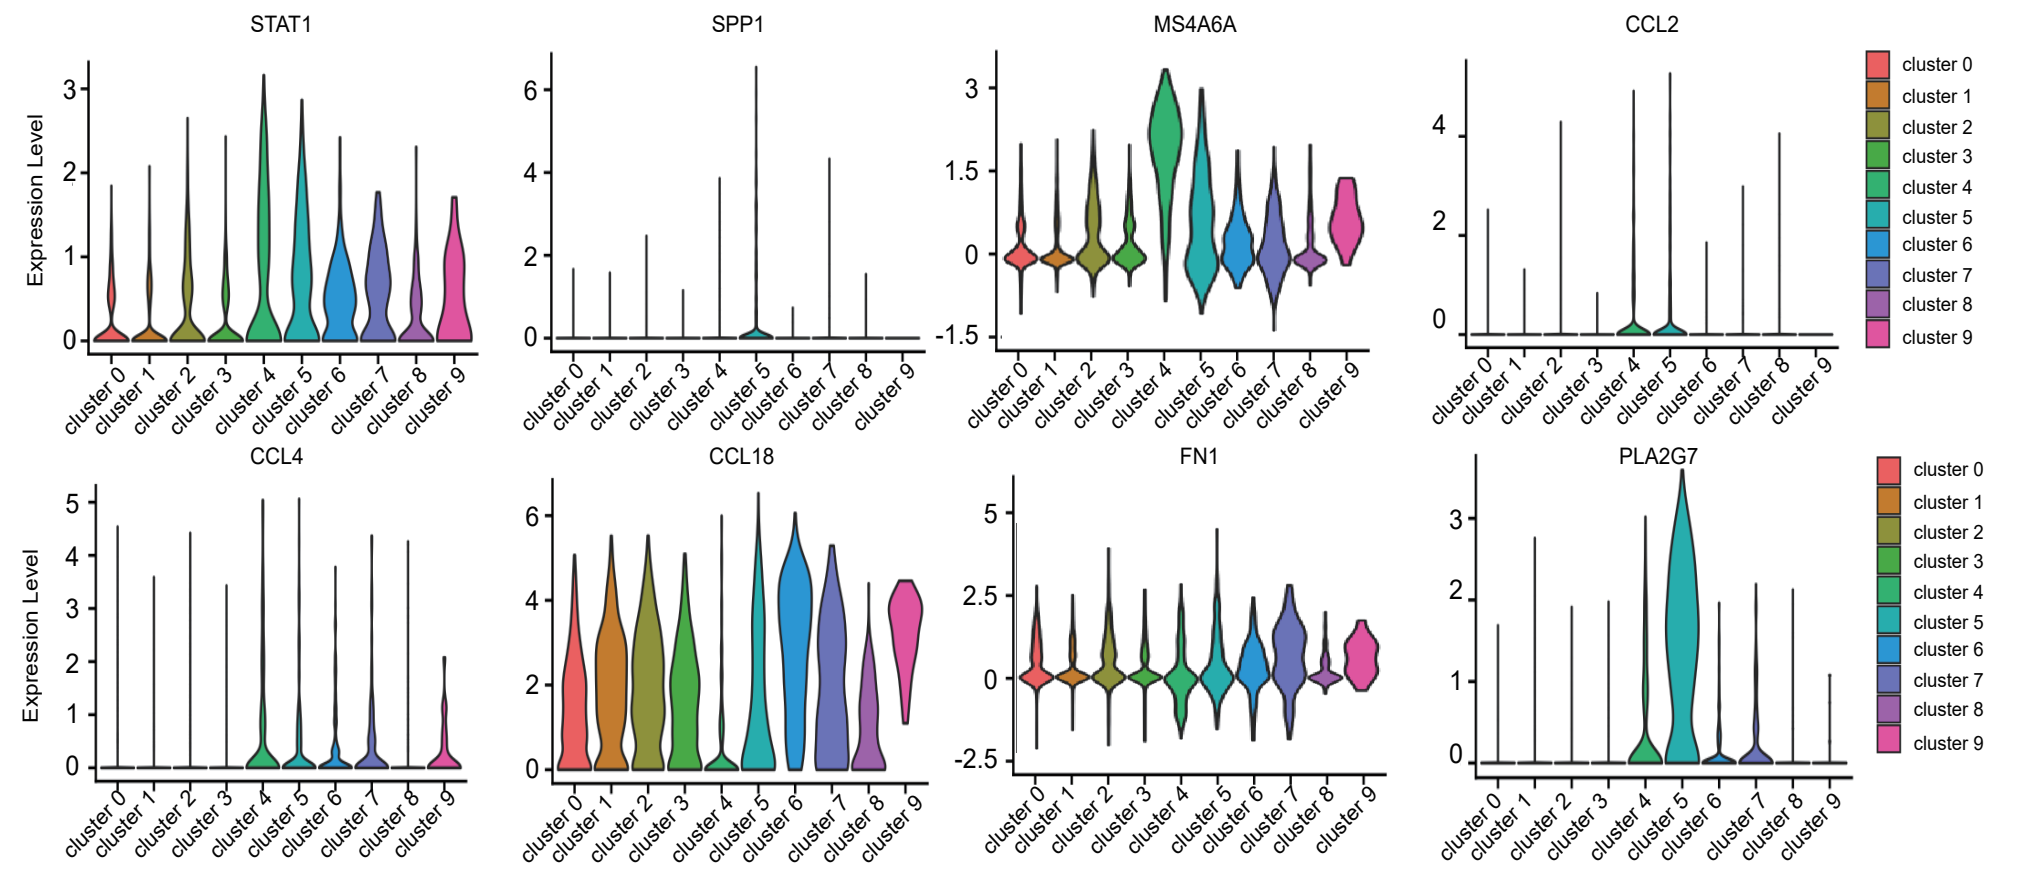

C

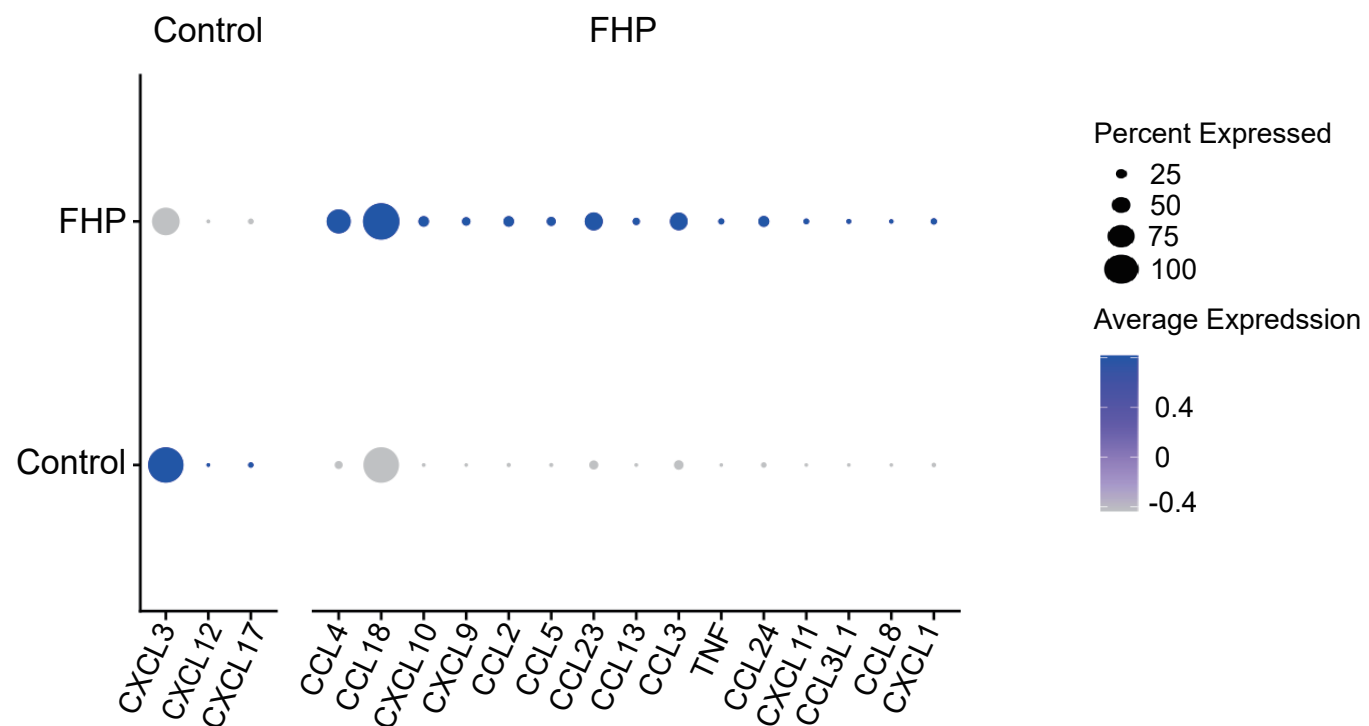

D

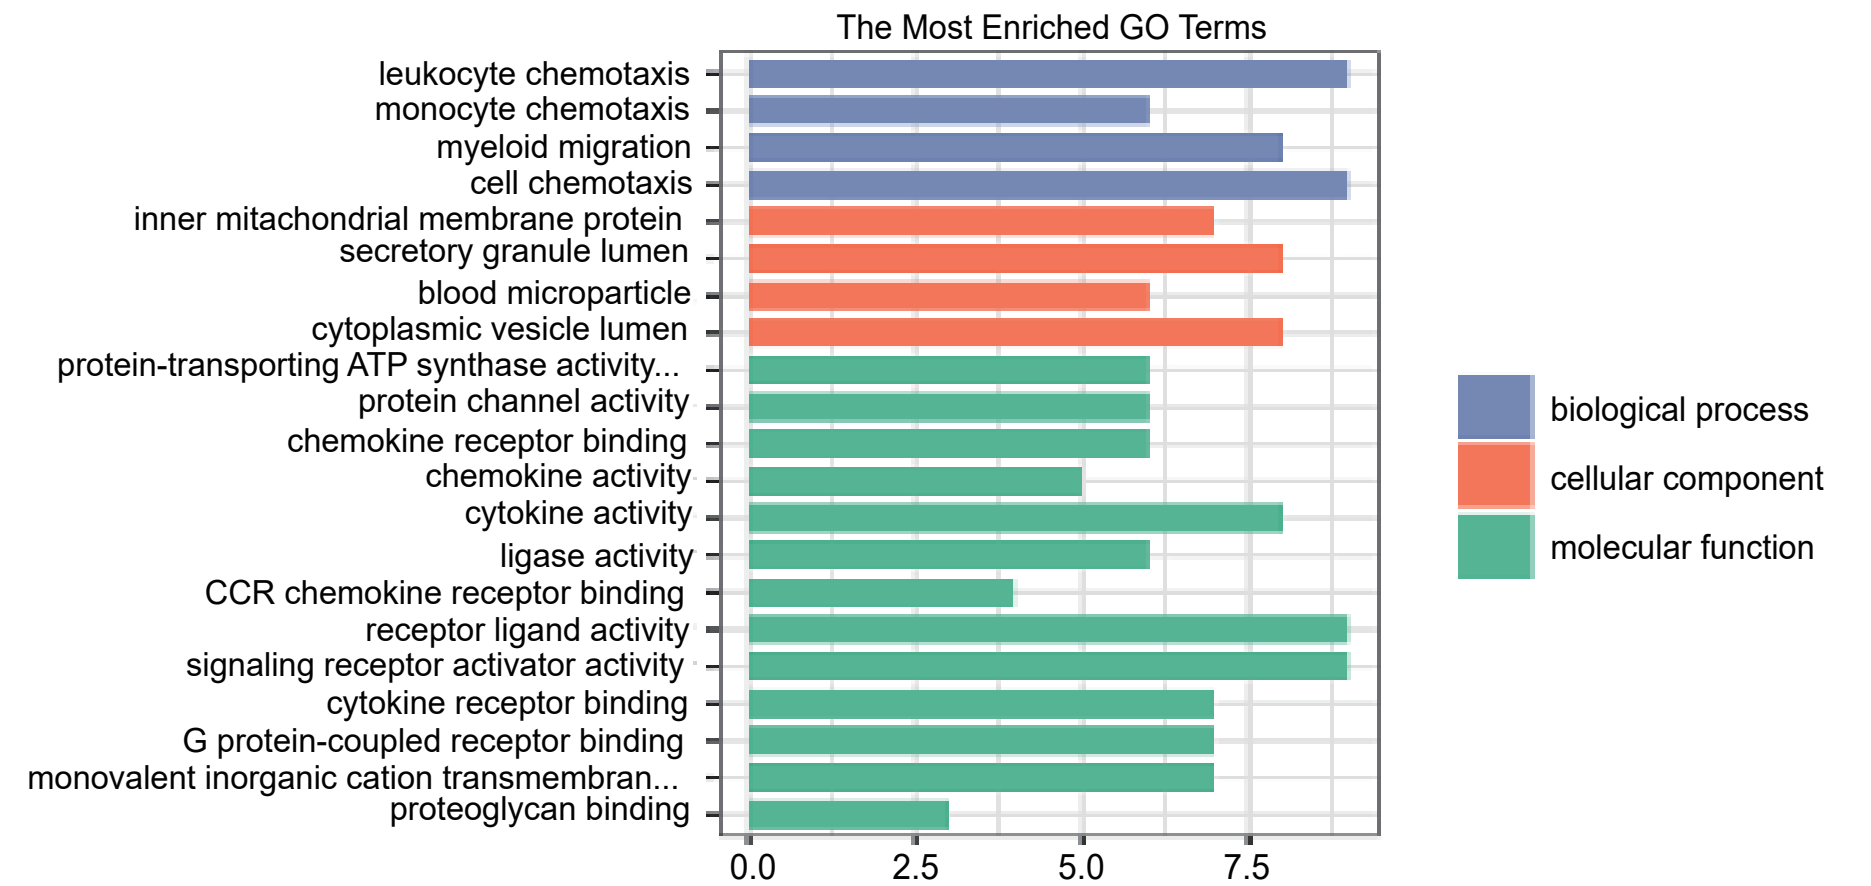

A

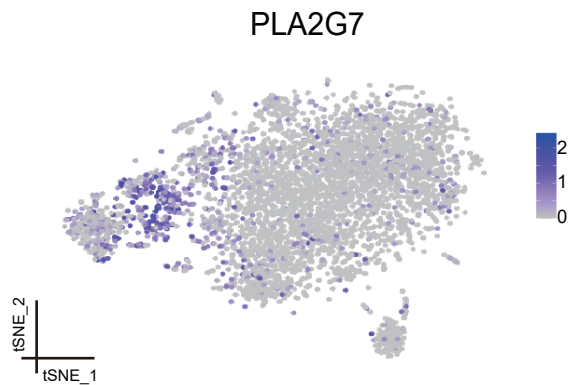

B

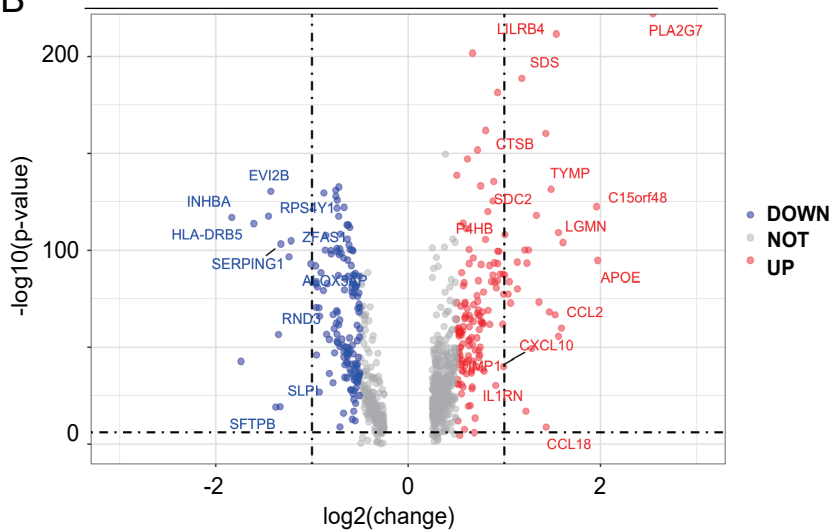

C

### The Most Enriched GO Terms

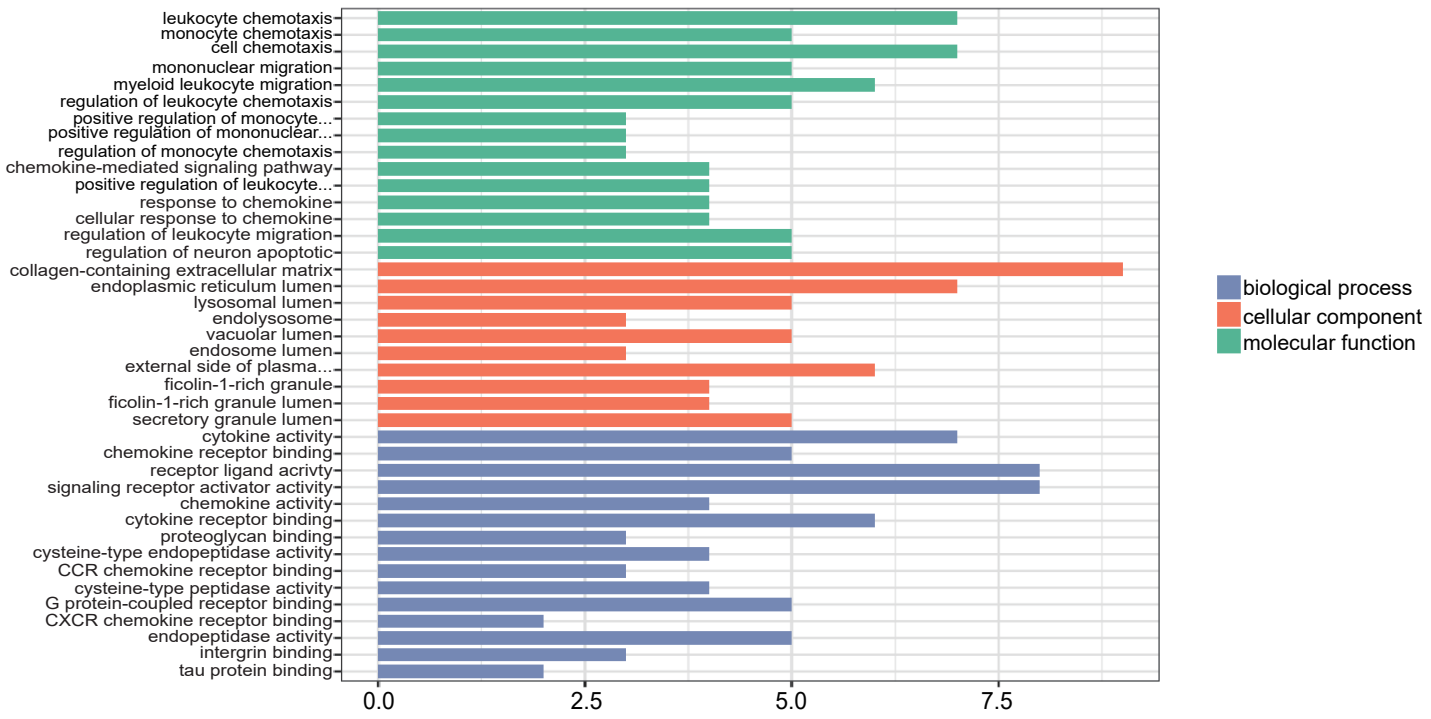



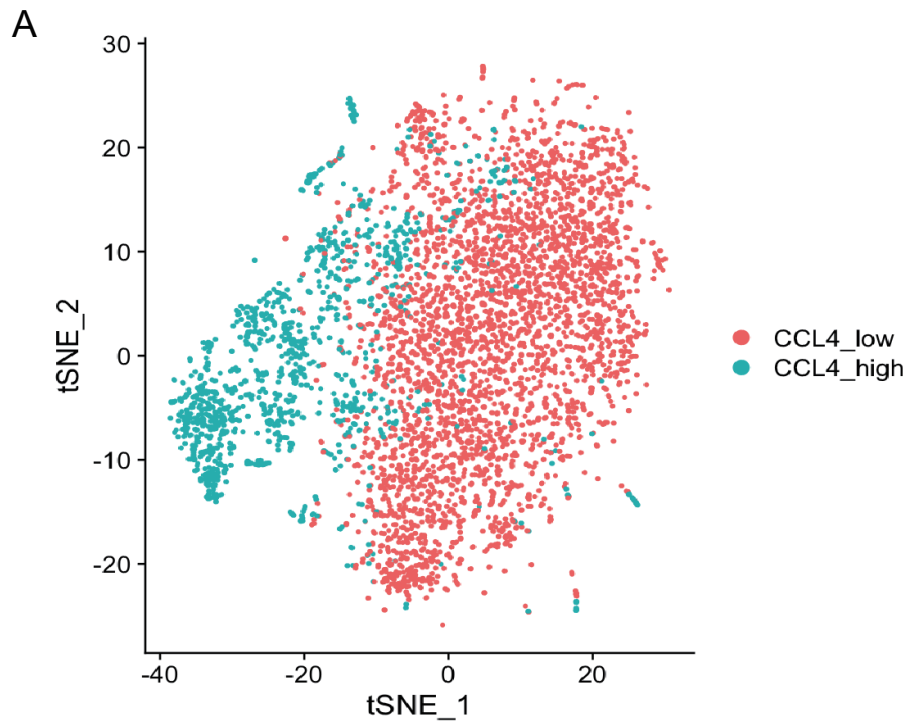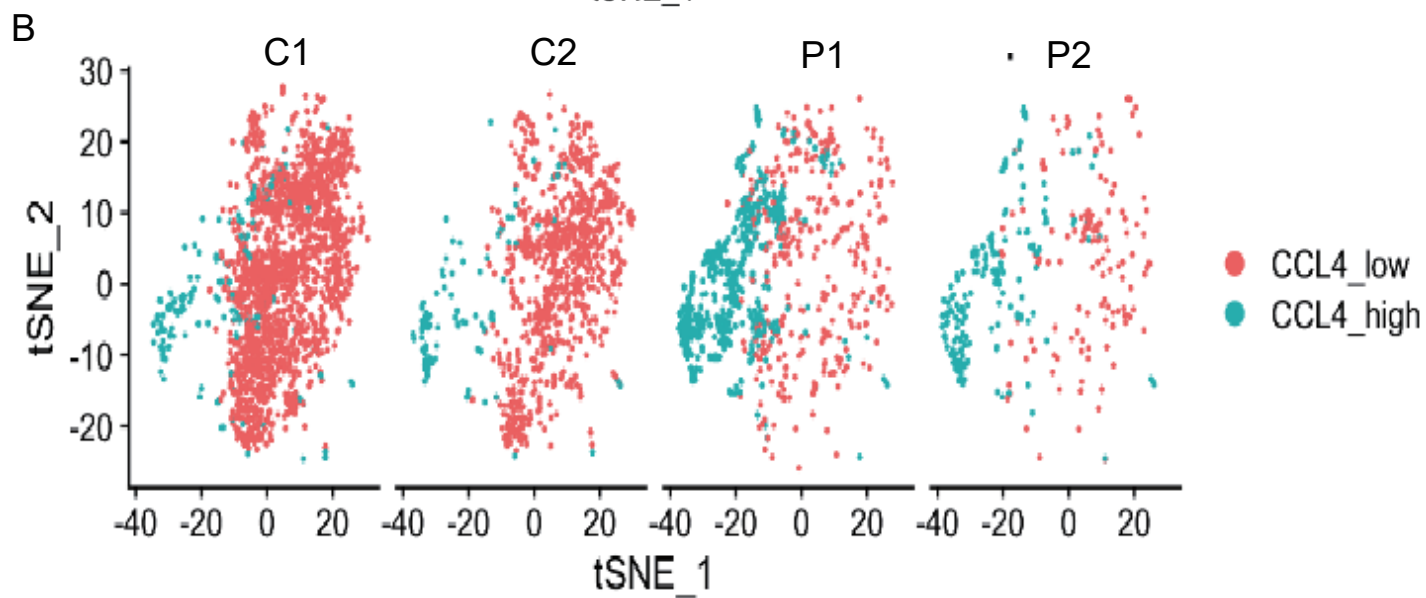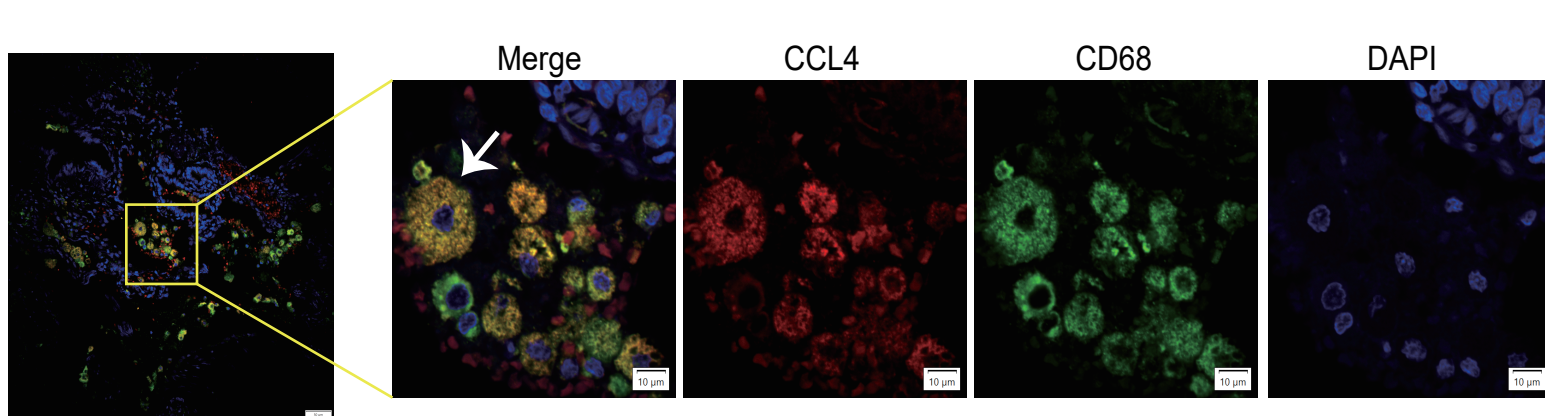

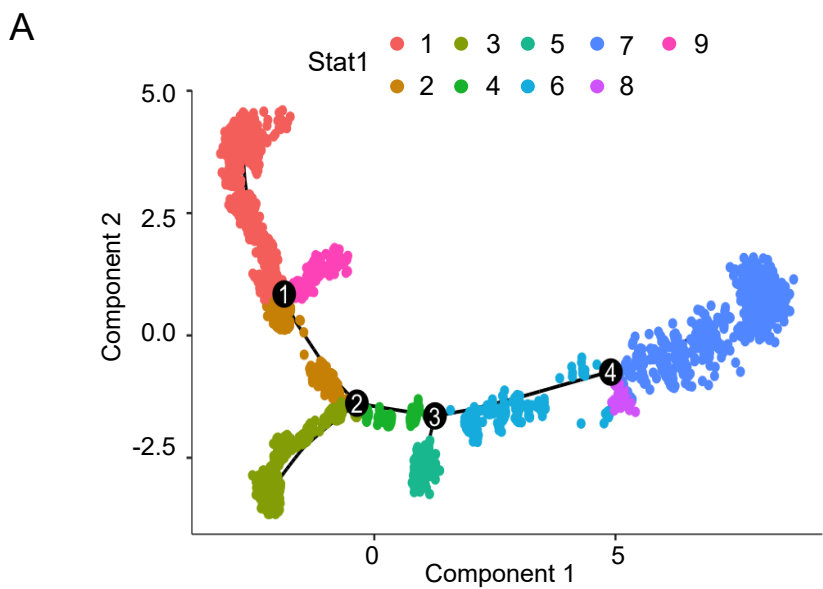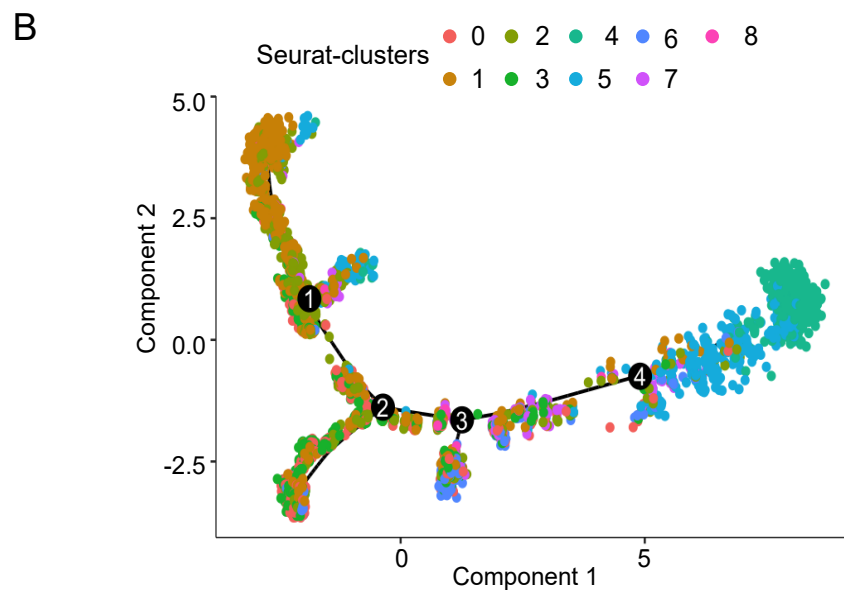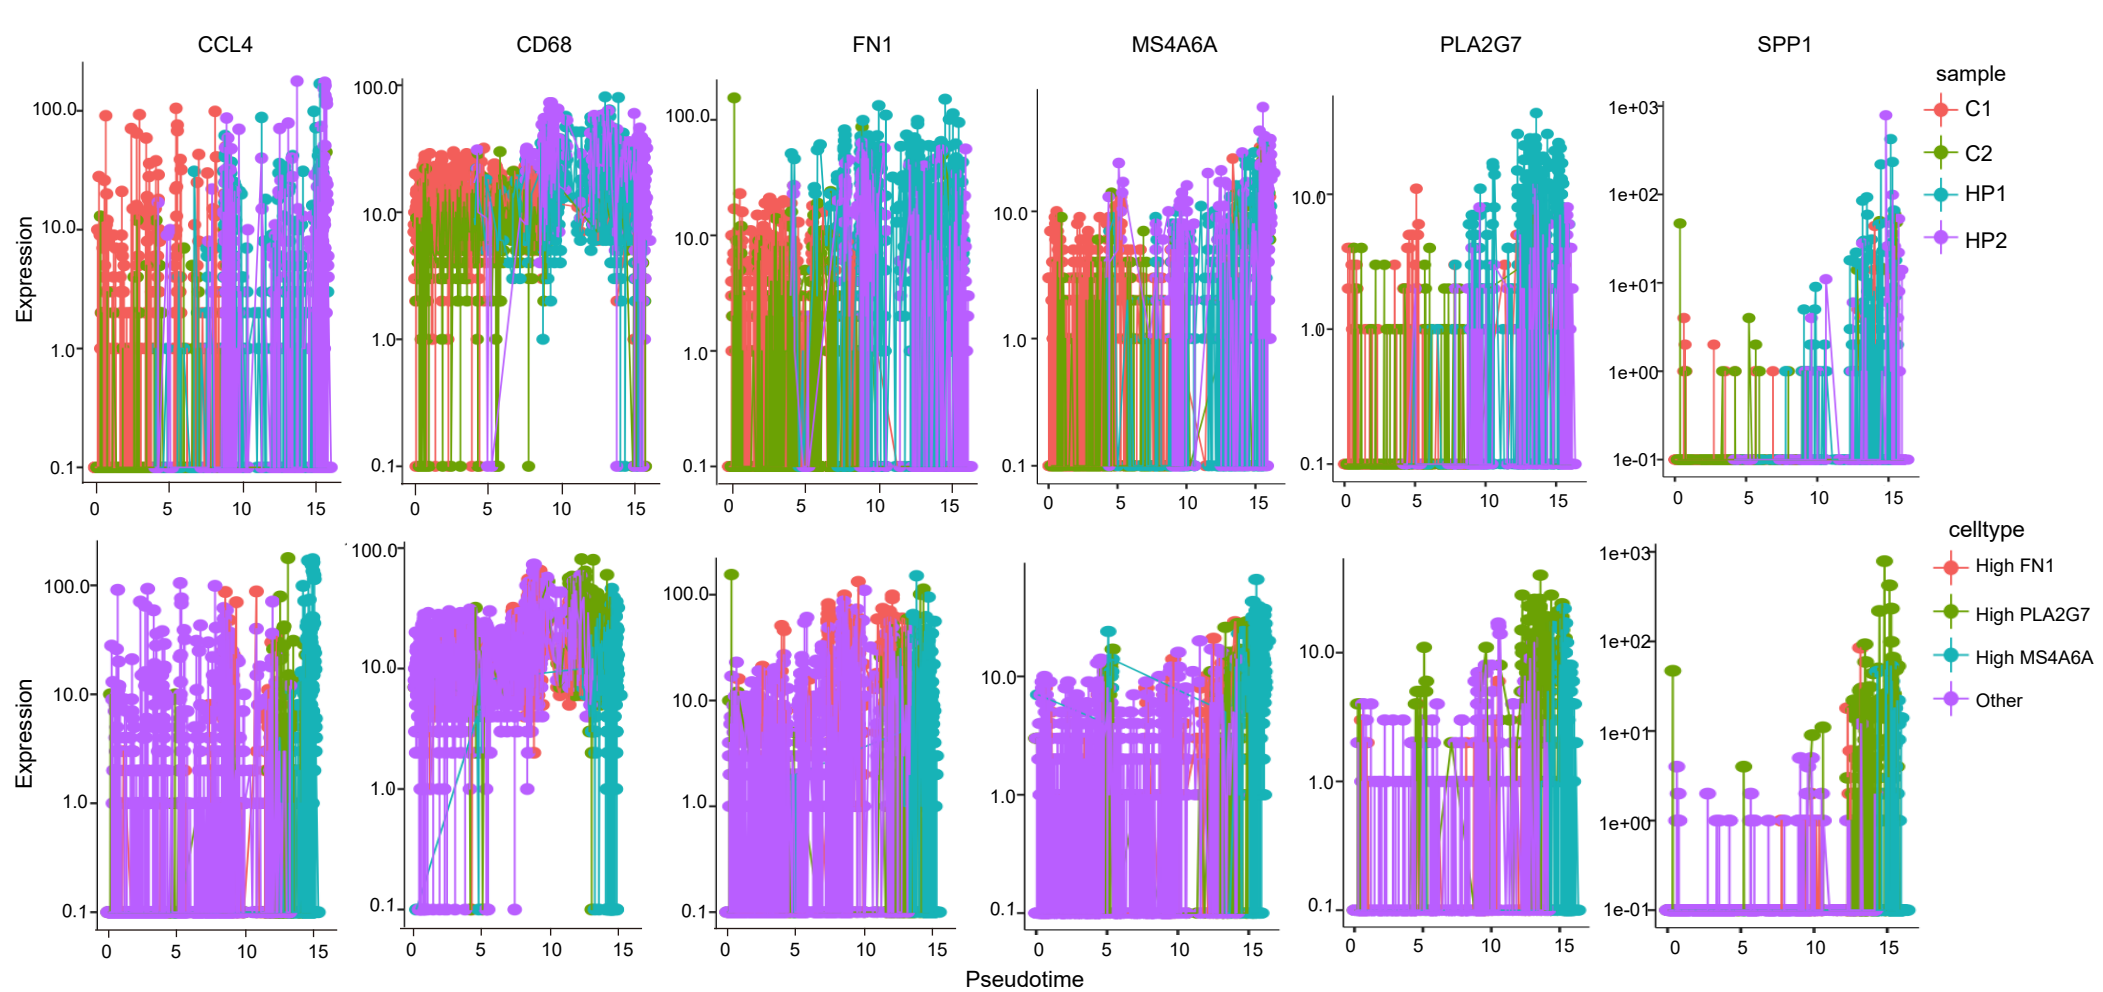

A

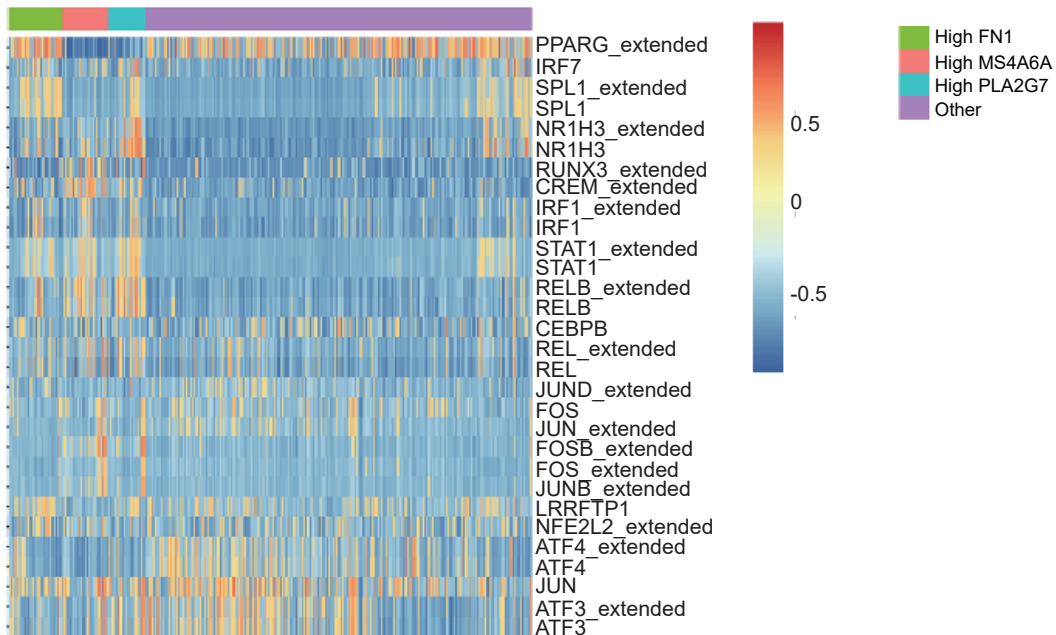

B

Cell Type

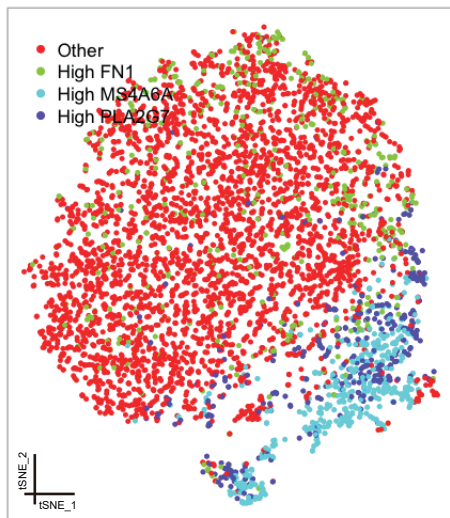

C

STAT1  
Gene set activity(AUC)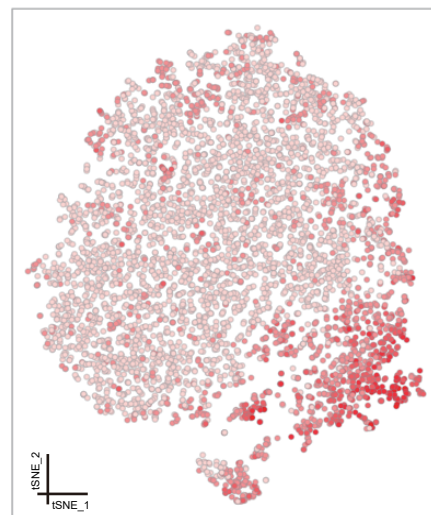

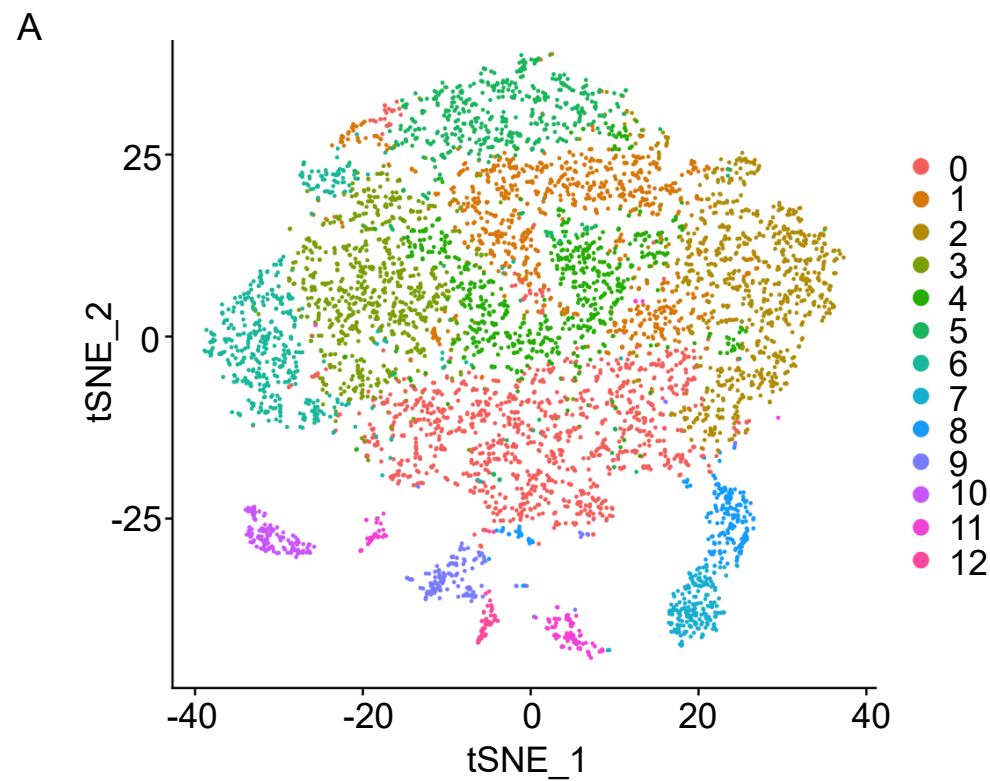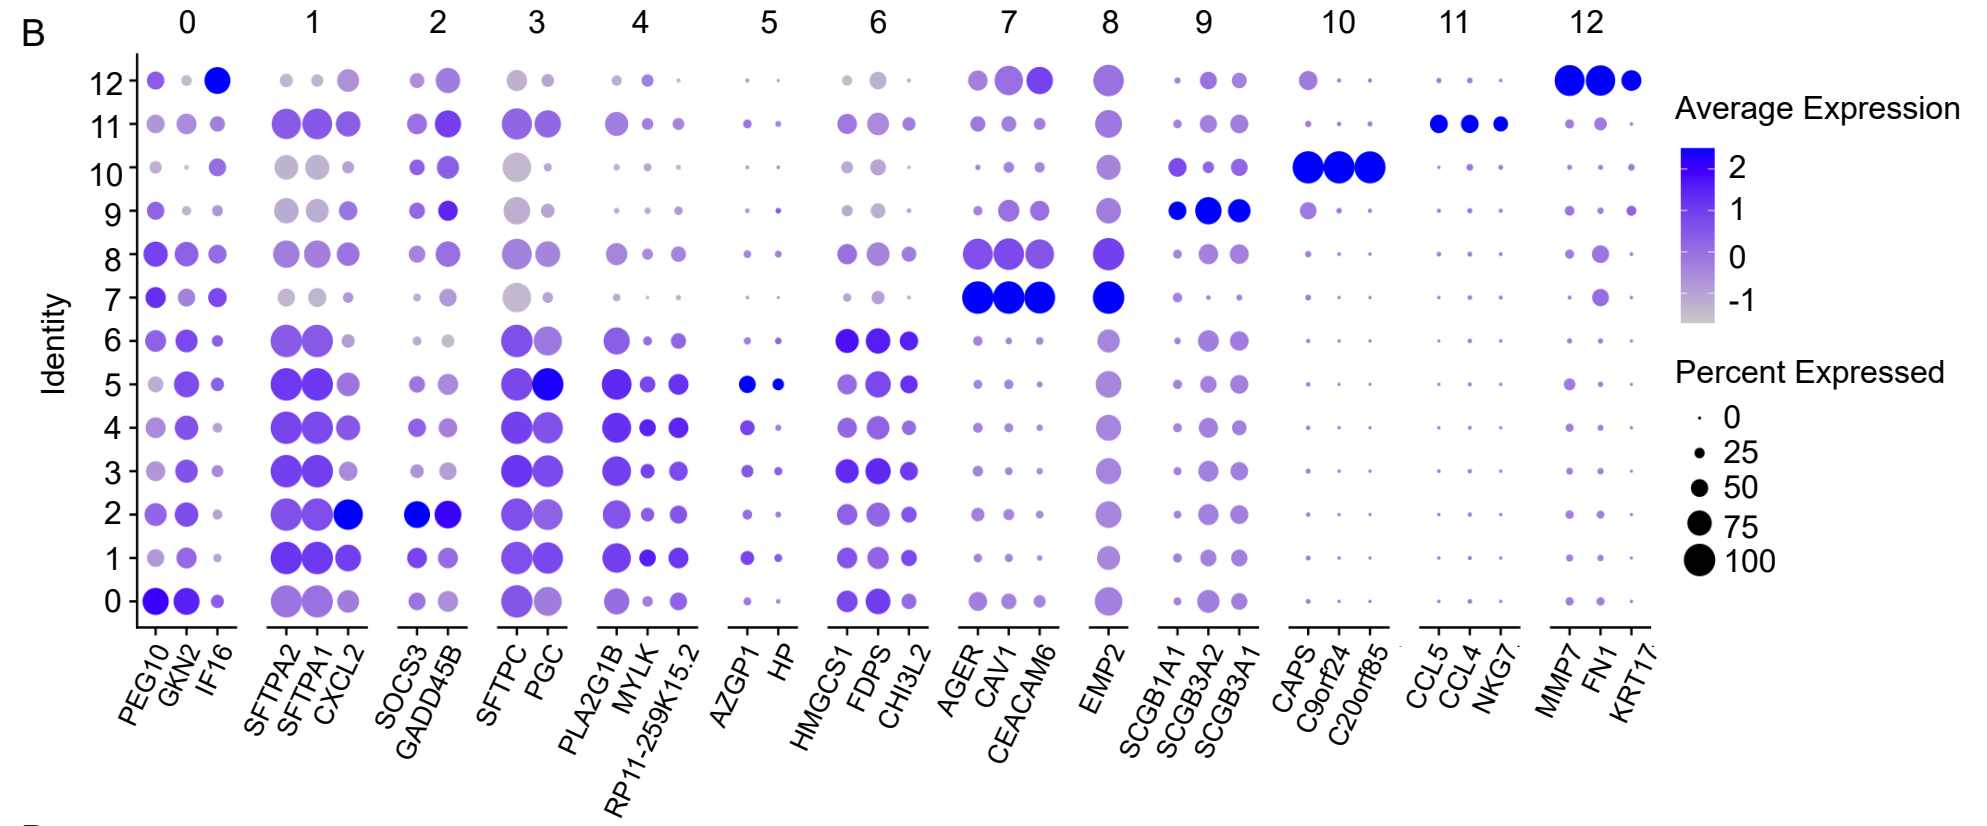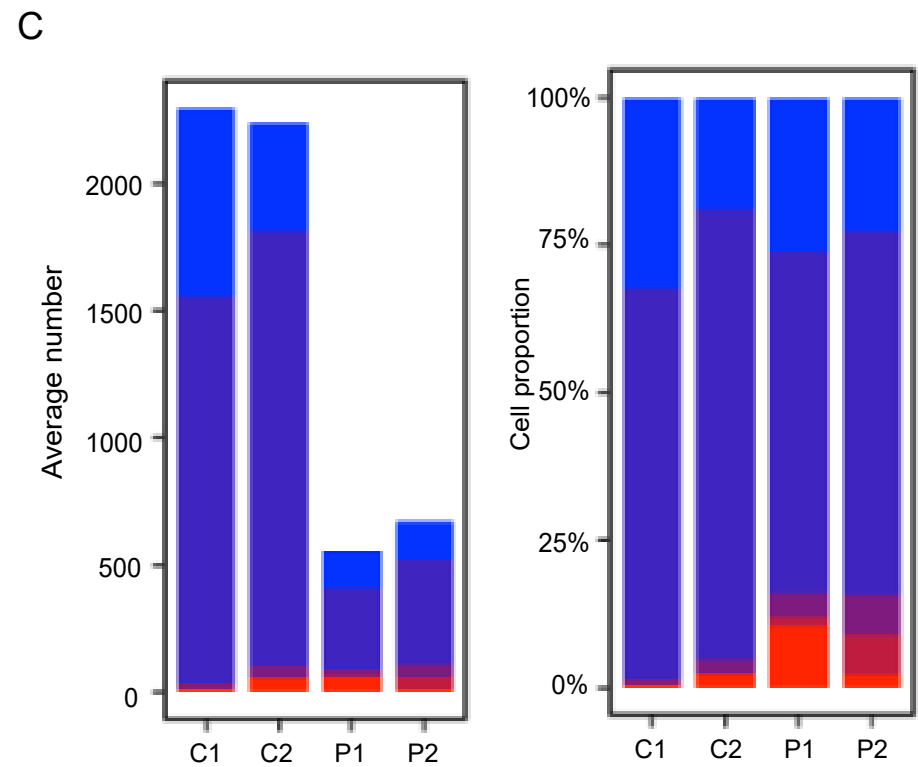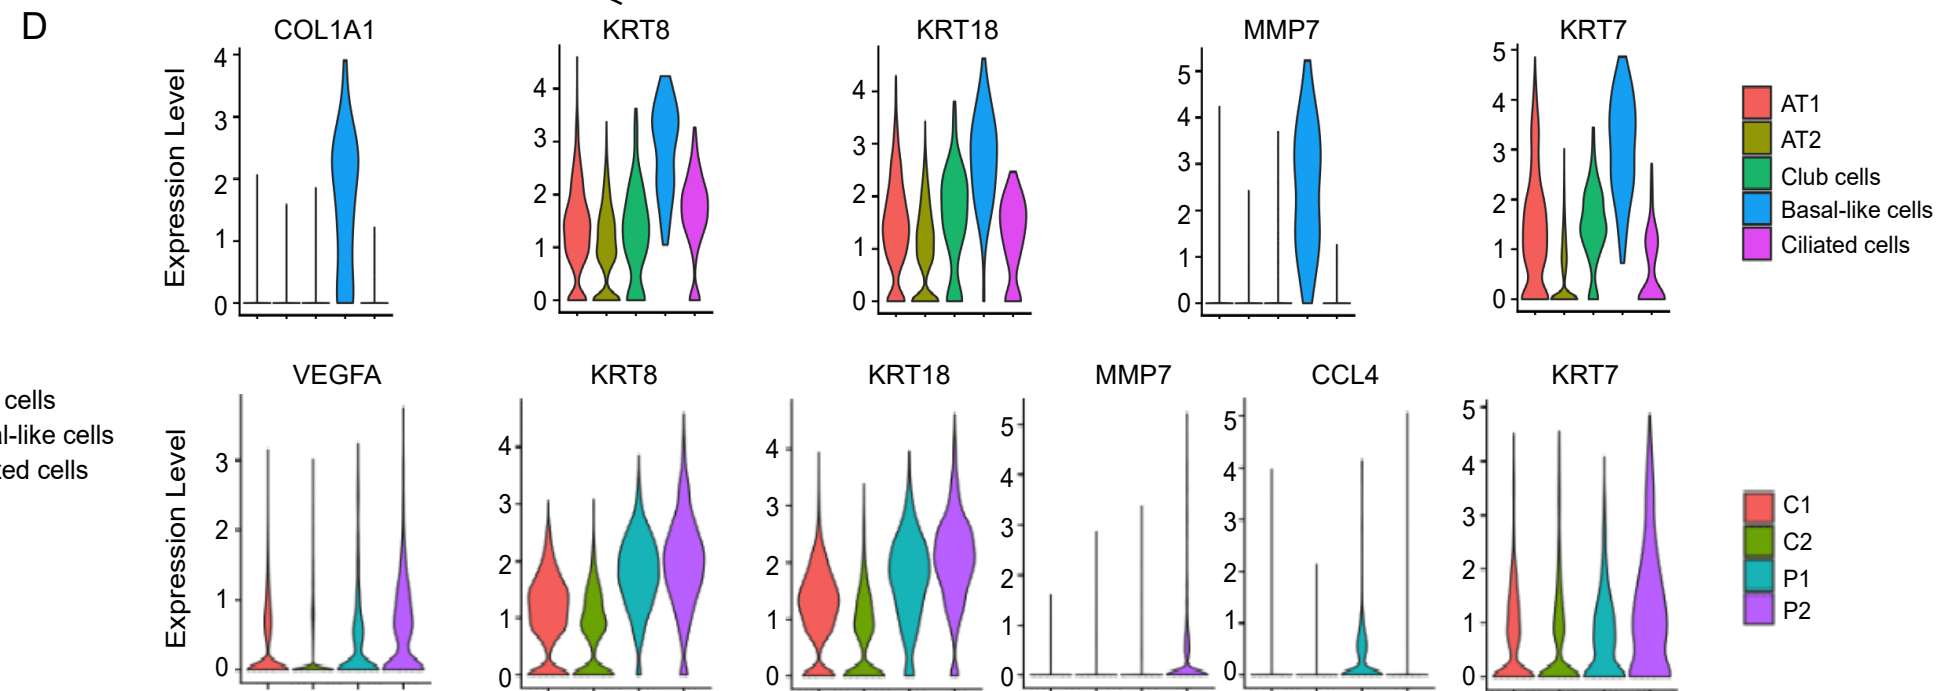

A

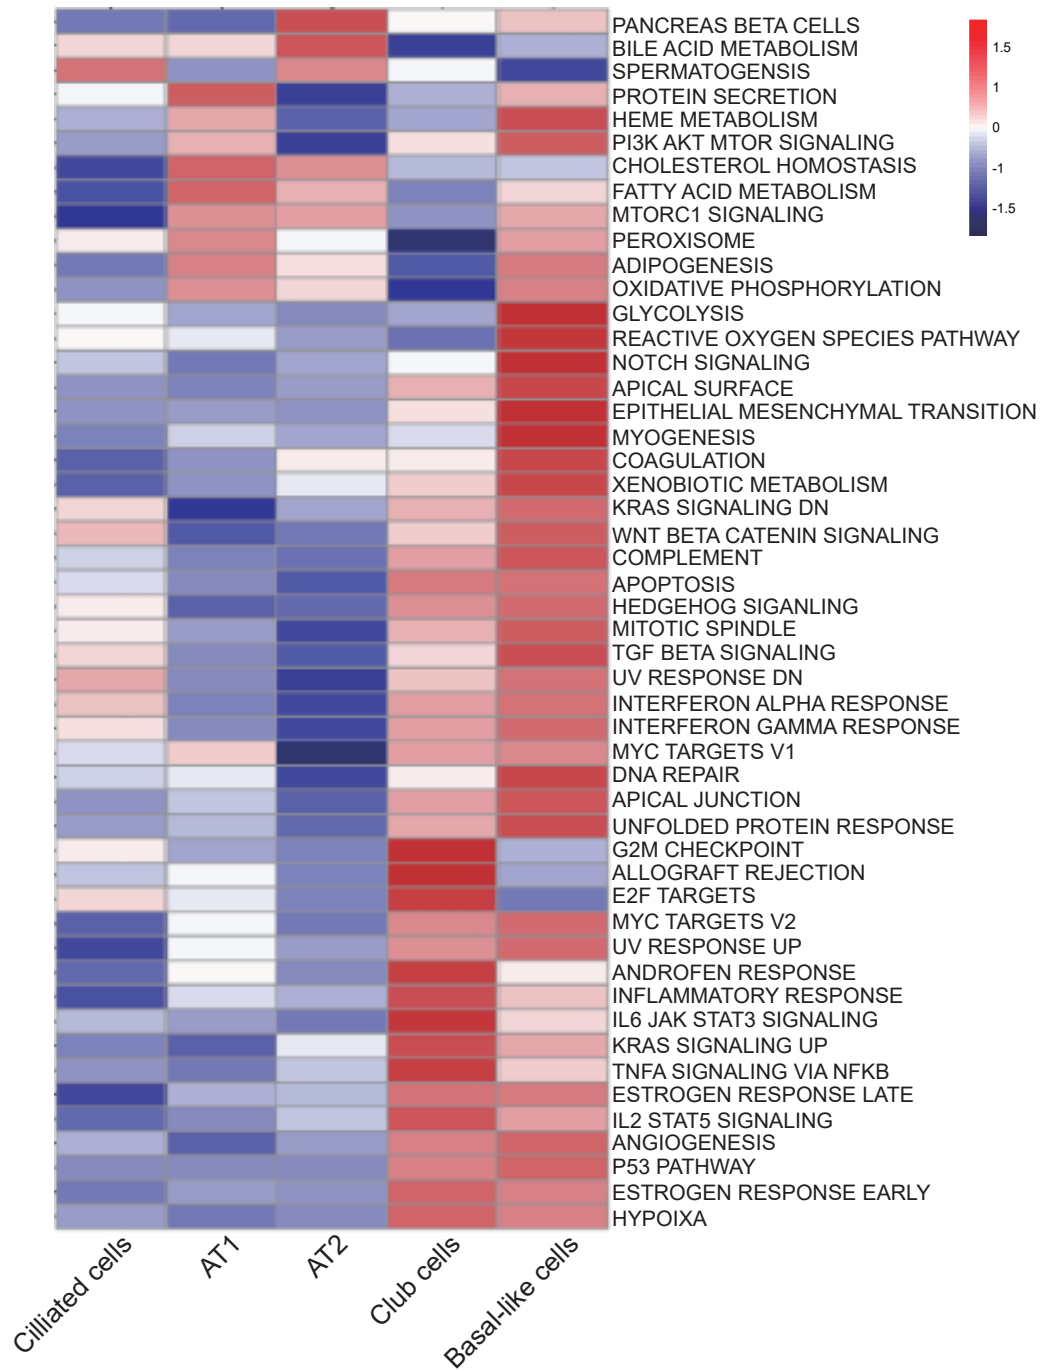

B

## Lung Basal Cell Signature

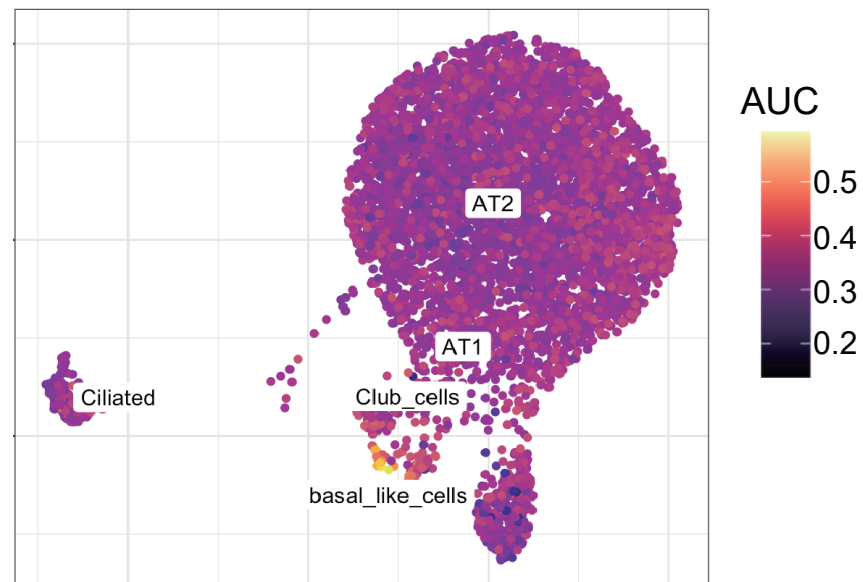

## EMT Signature

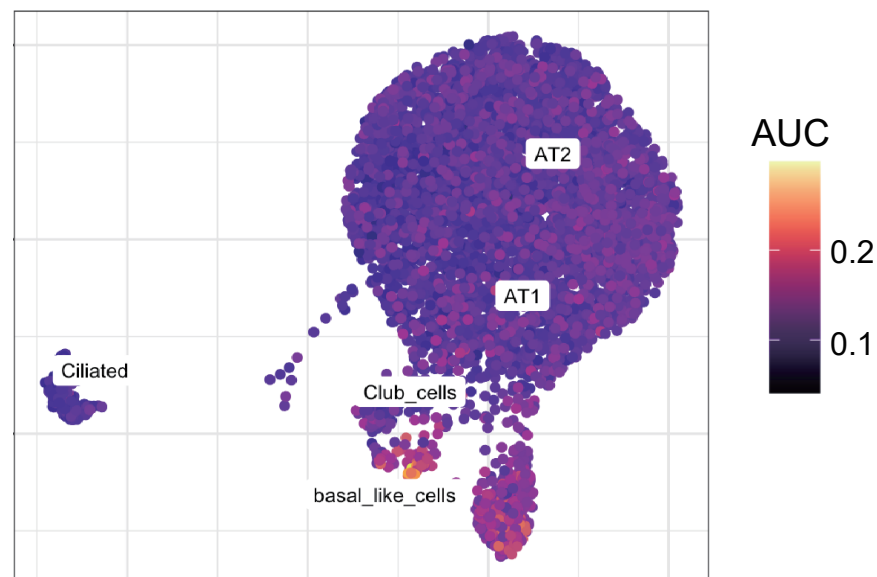

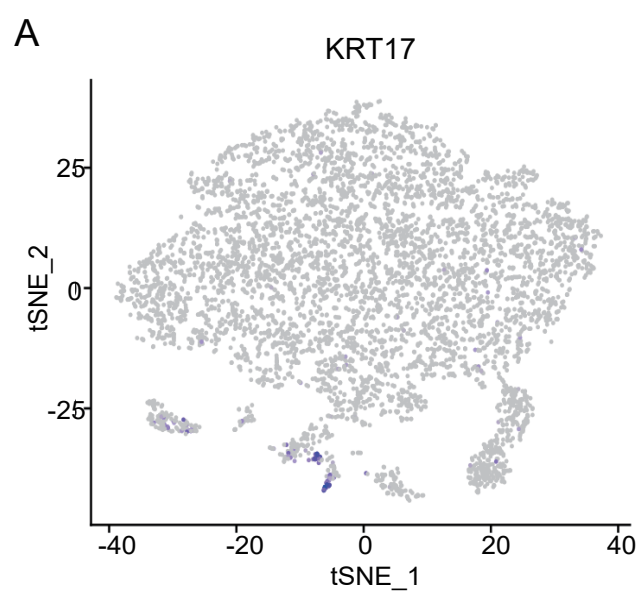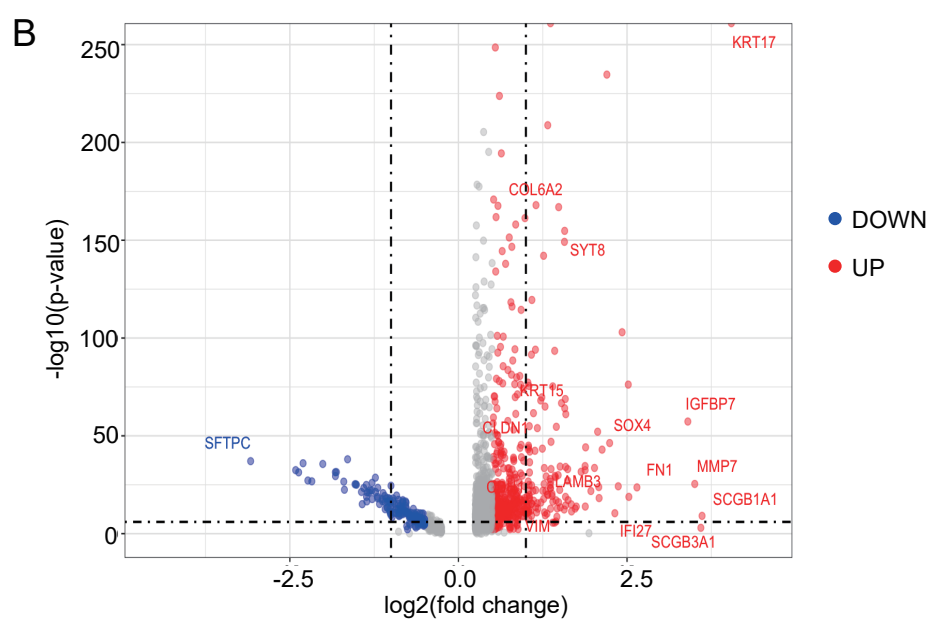

**C**

The Most Enriched GO Terms

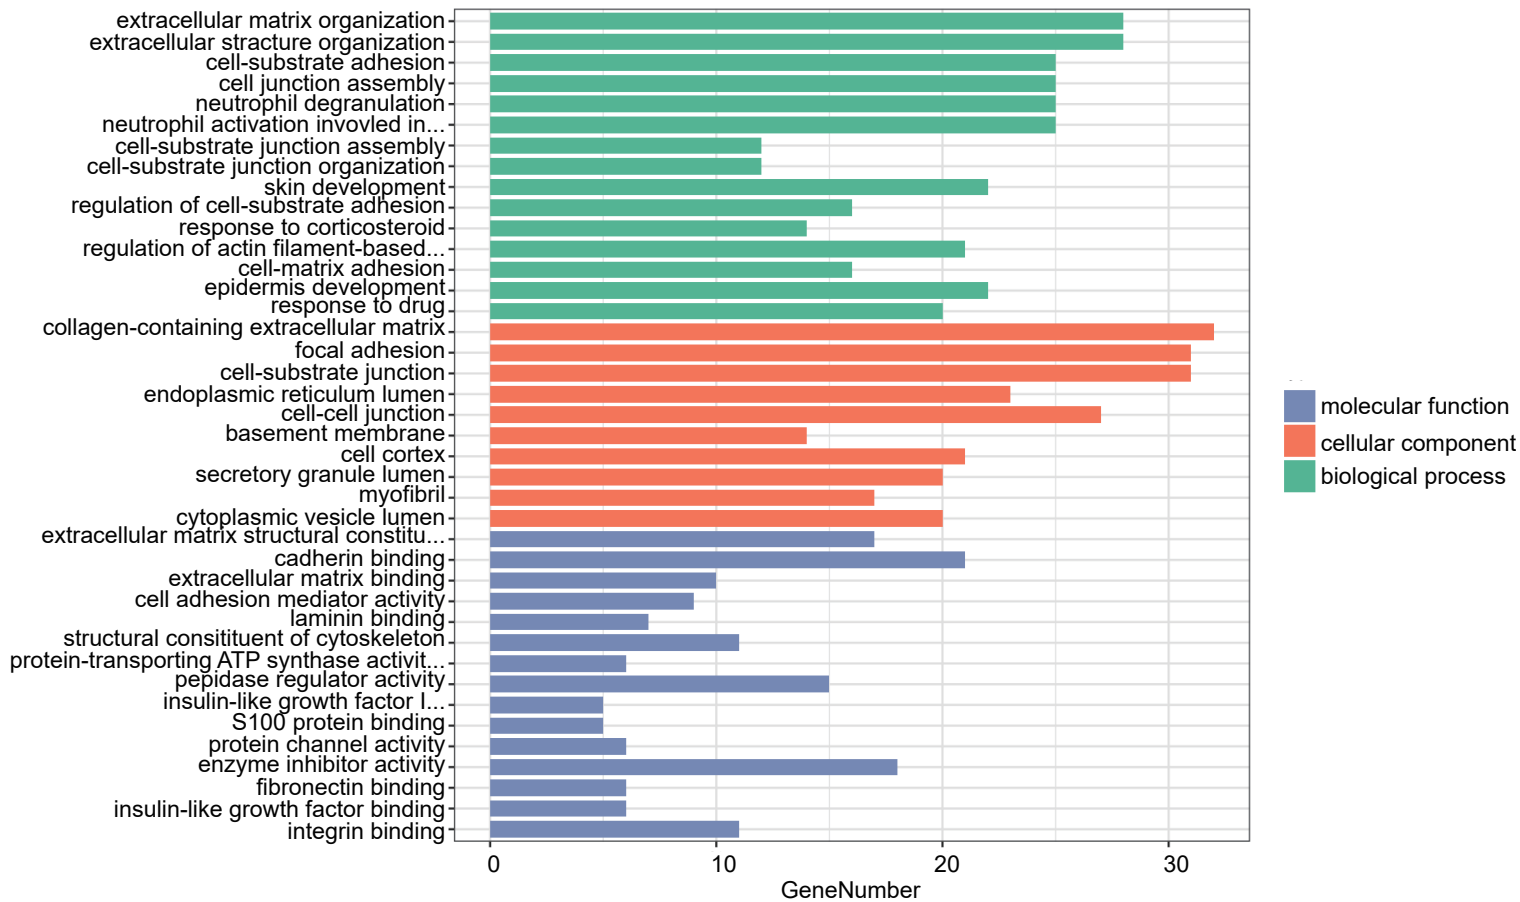

KRT17

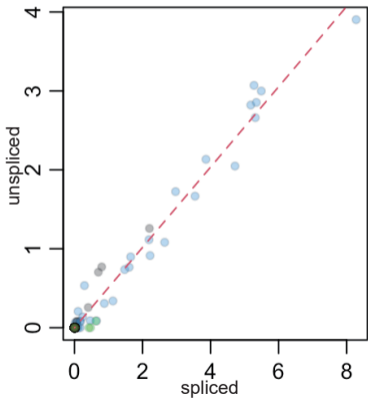

KRT17

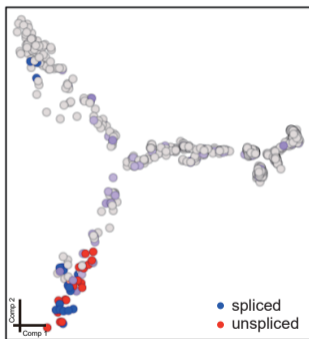

A

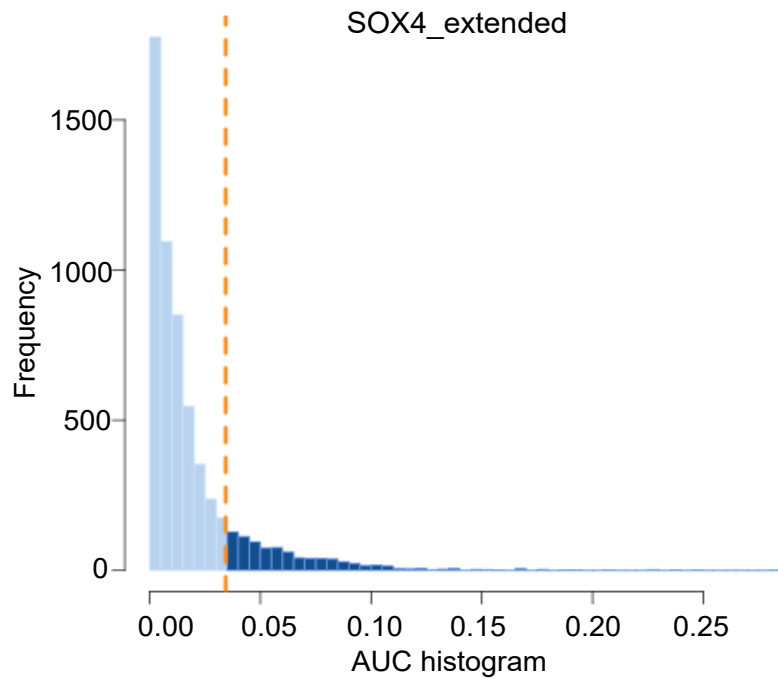

B

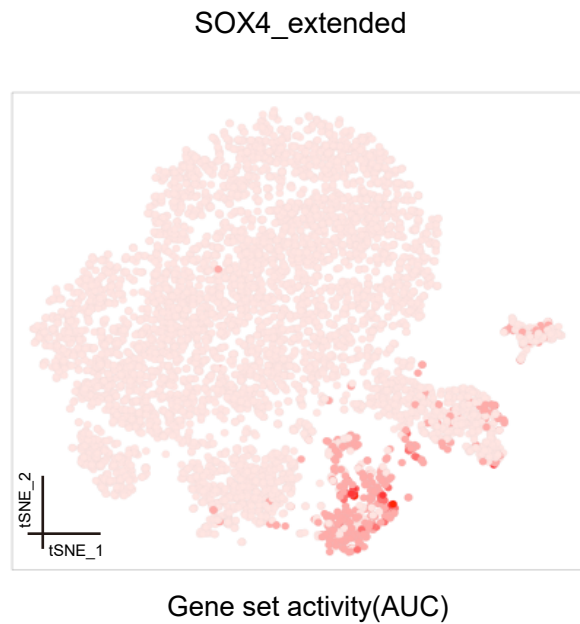



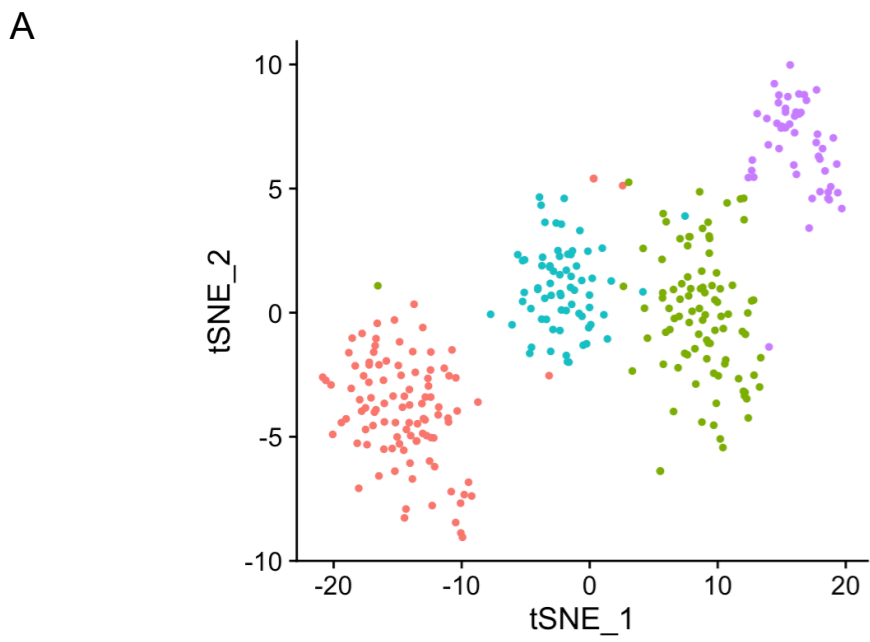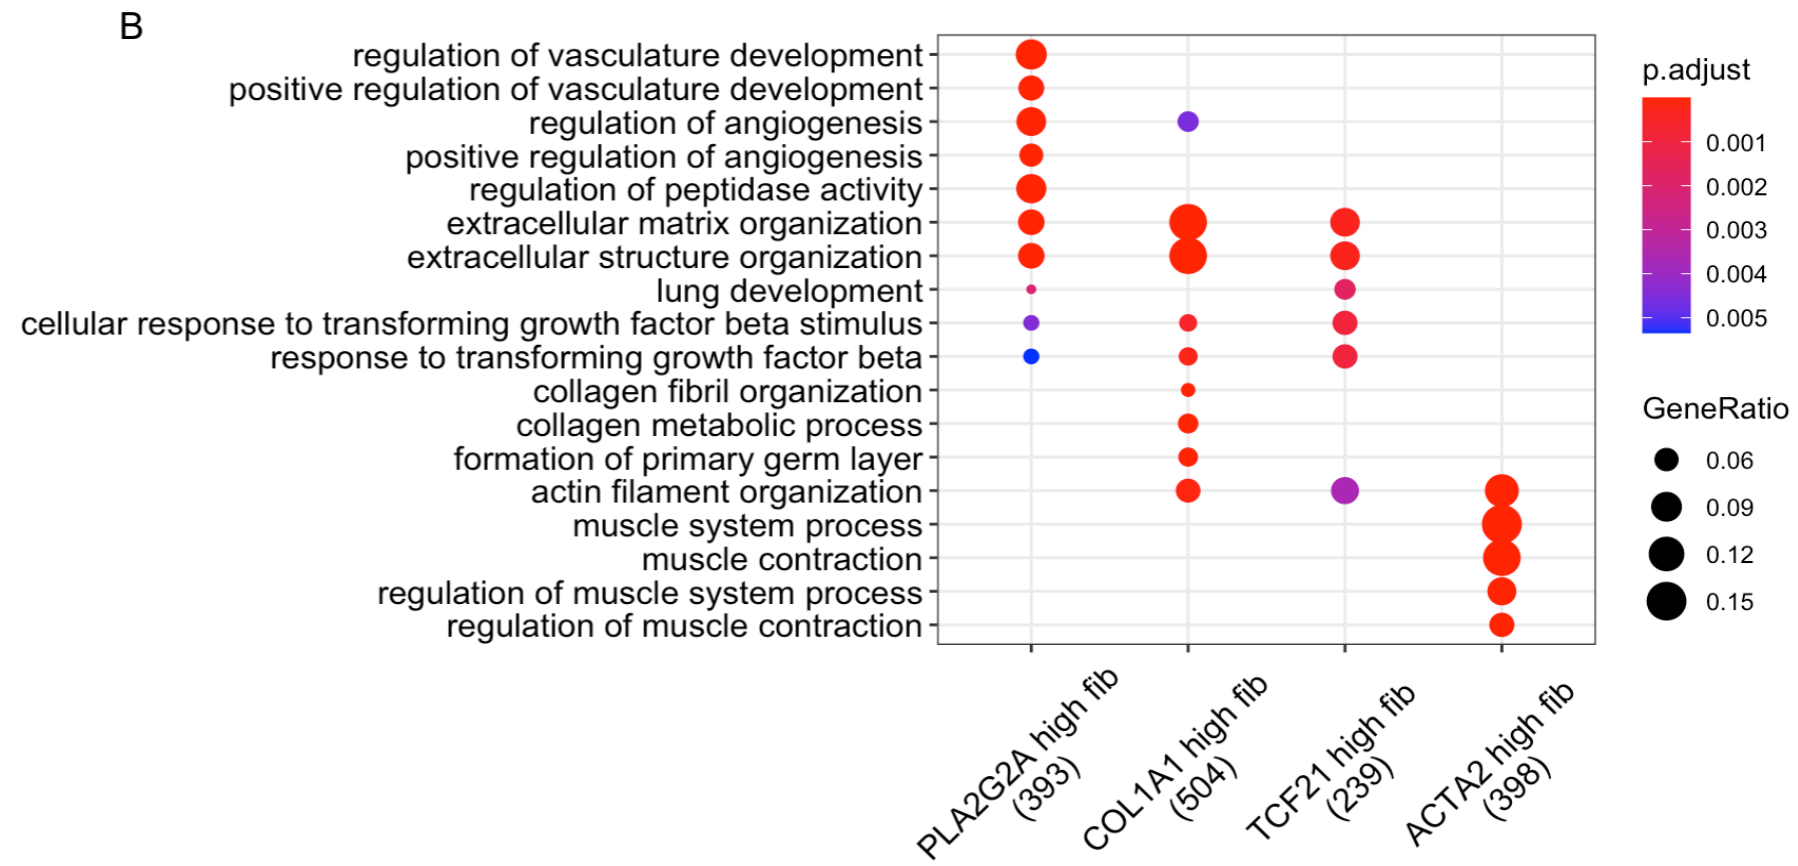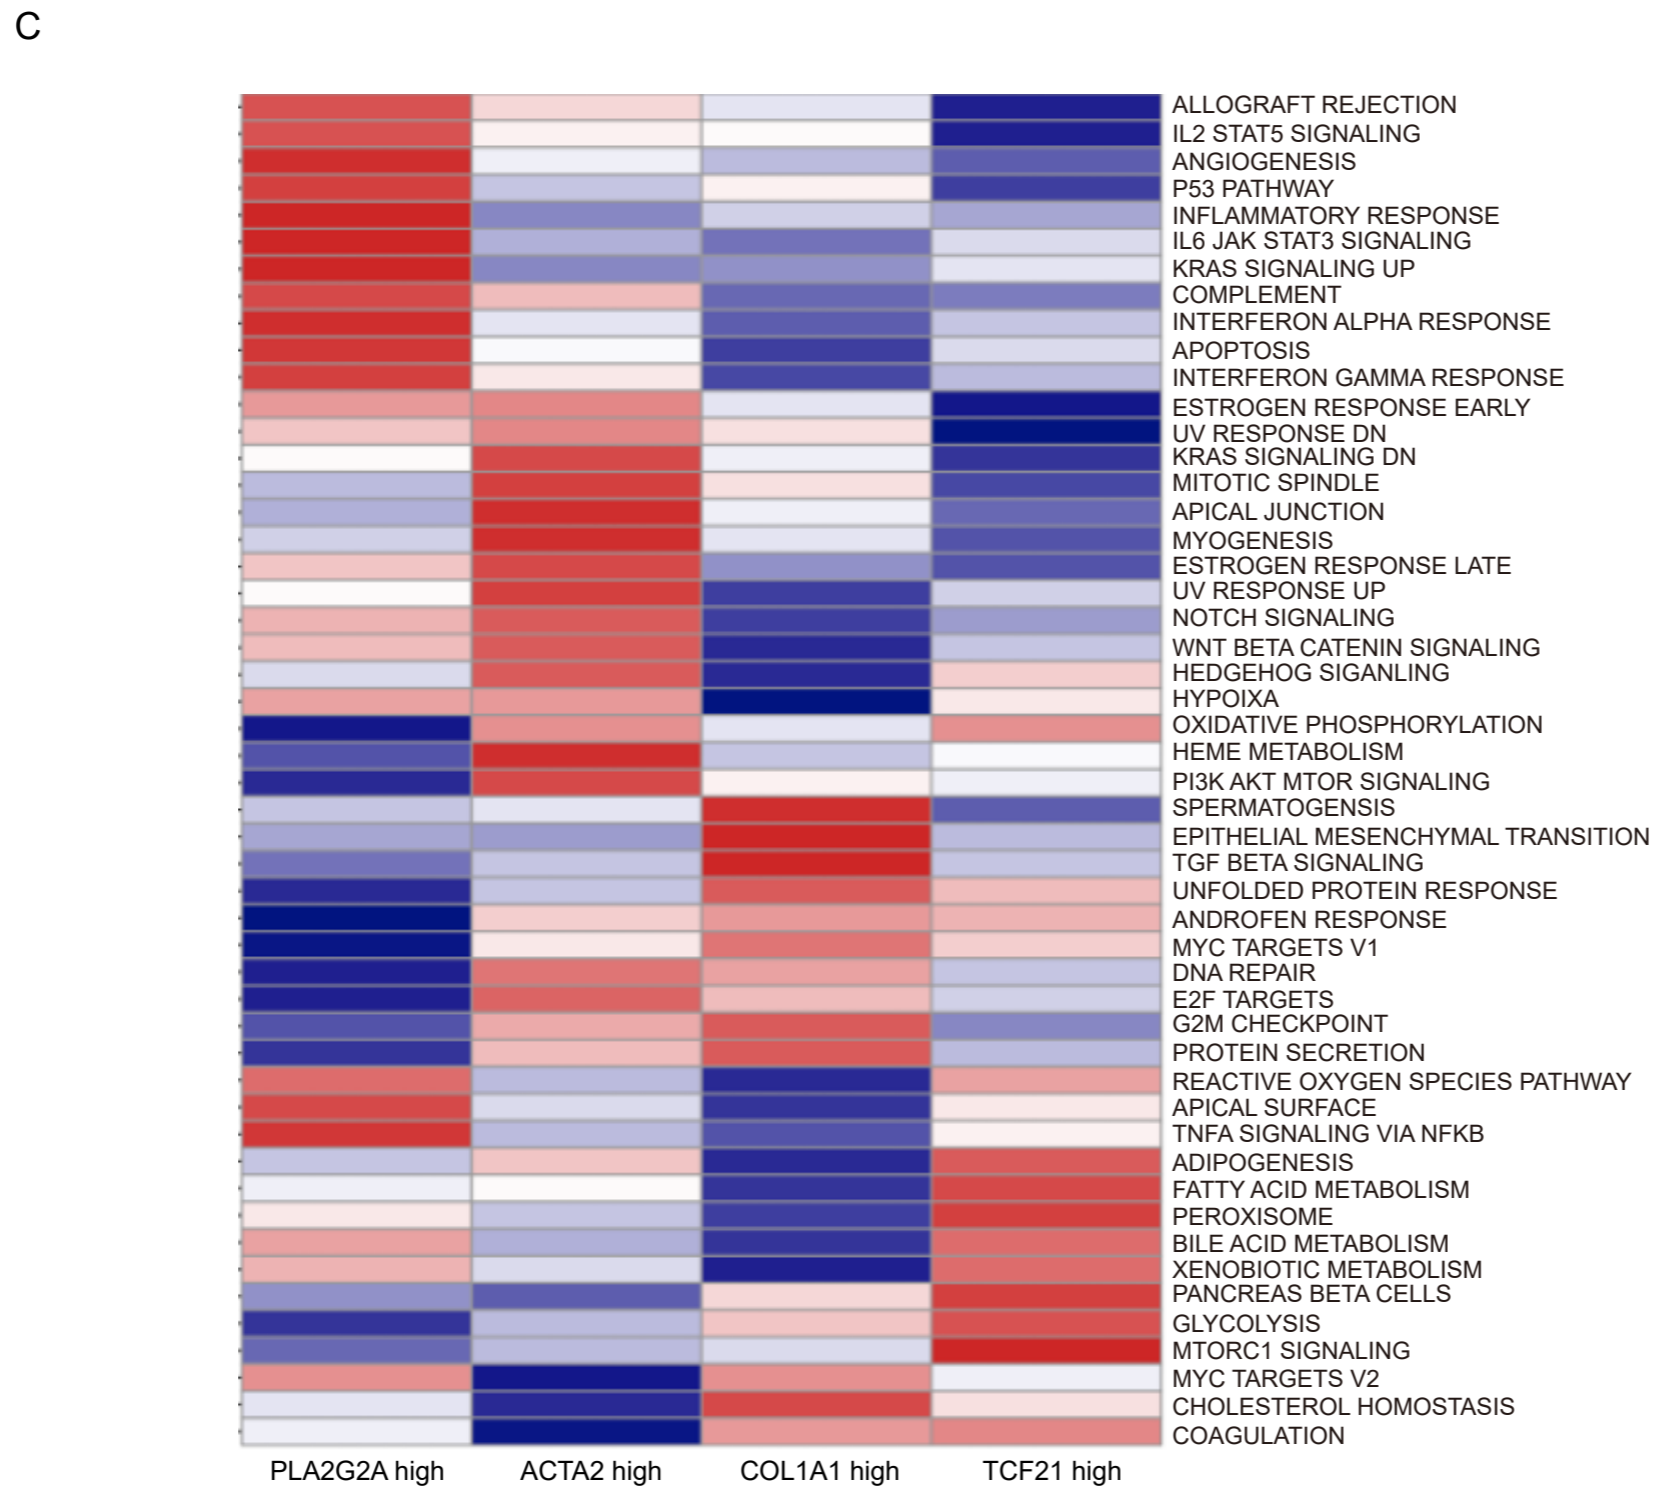

A

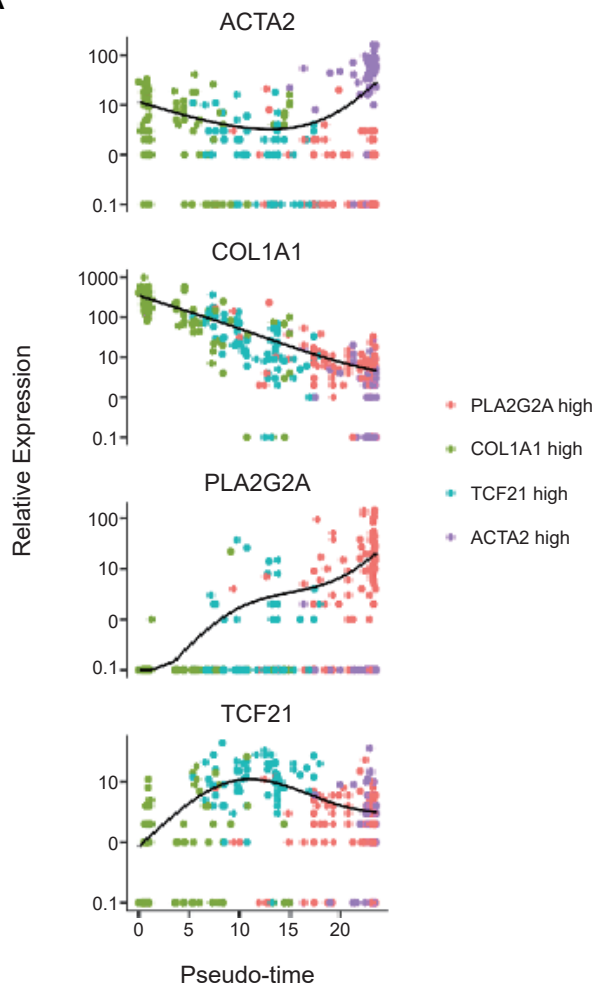

B

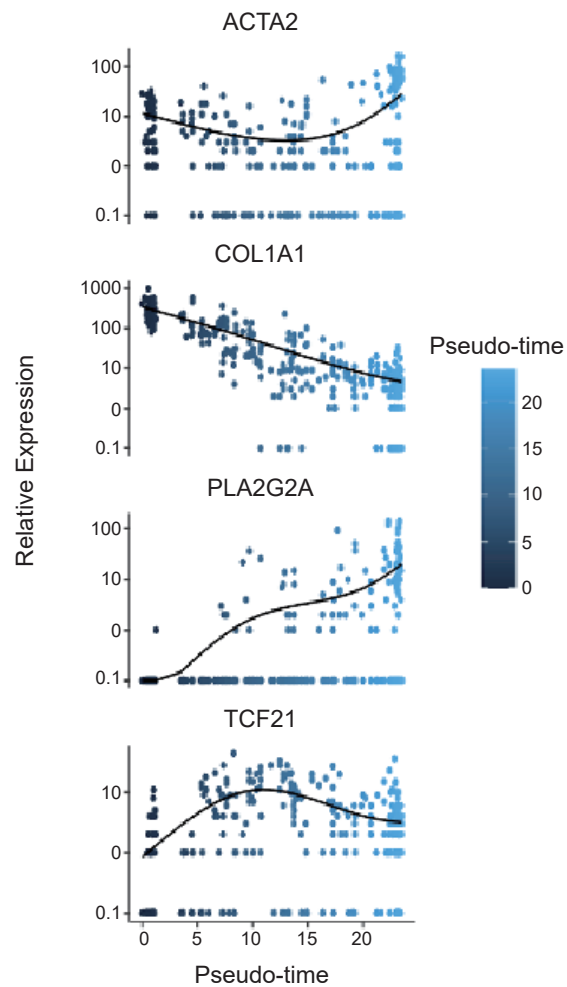

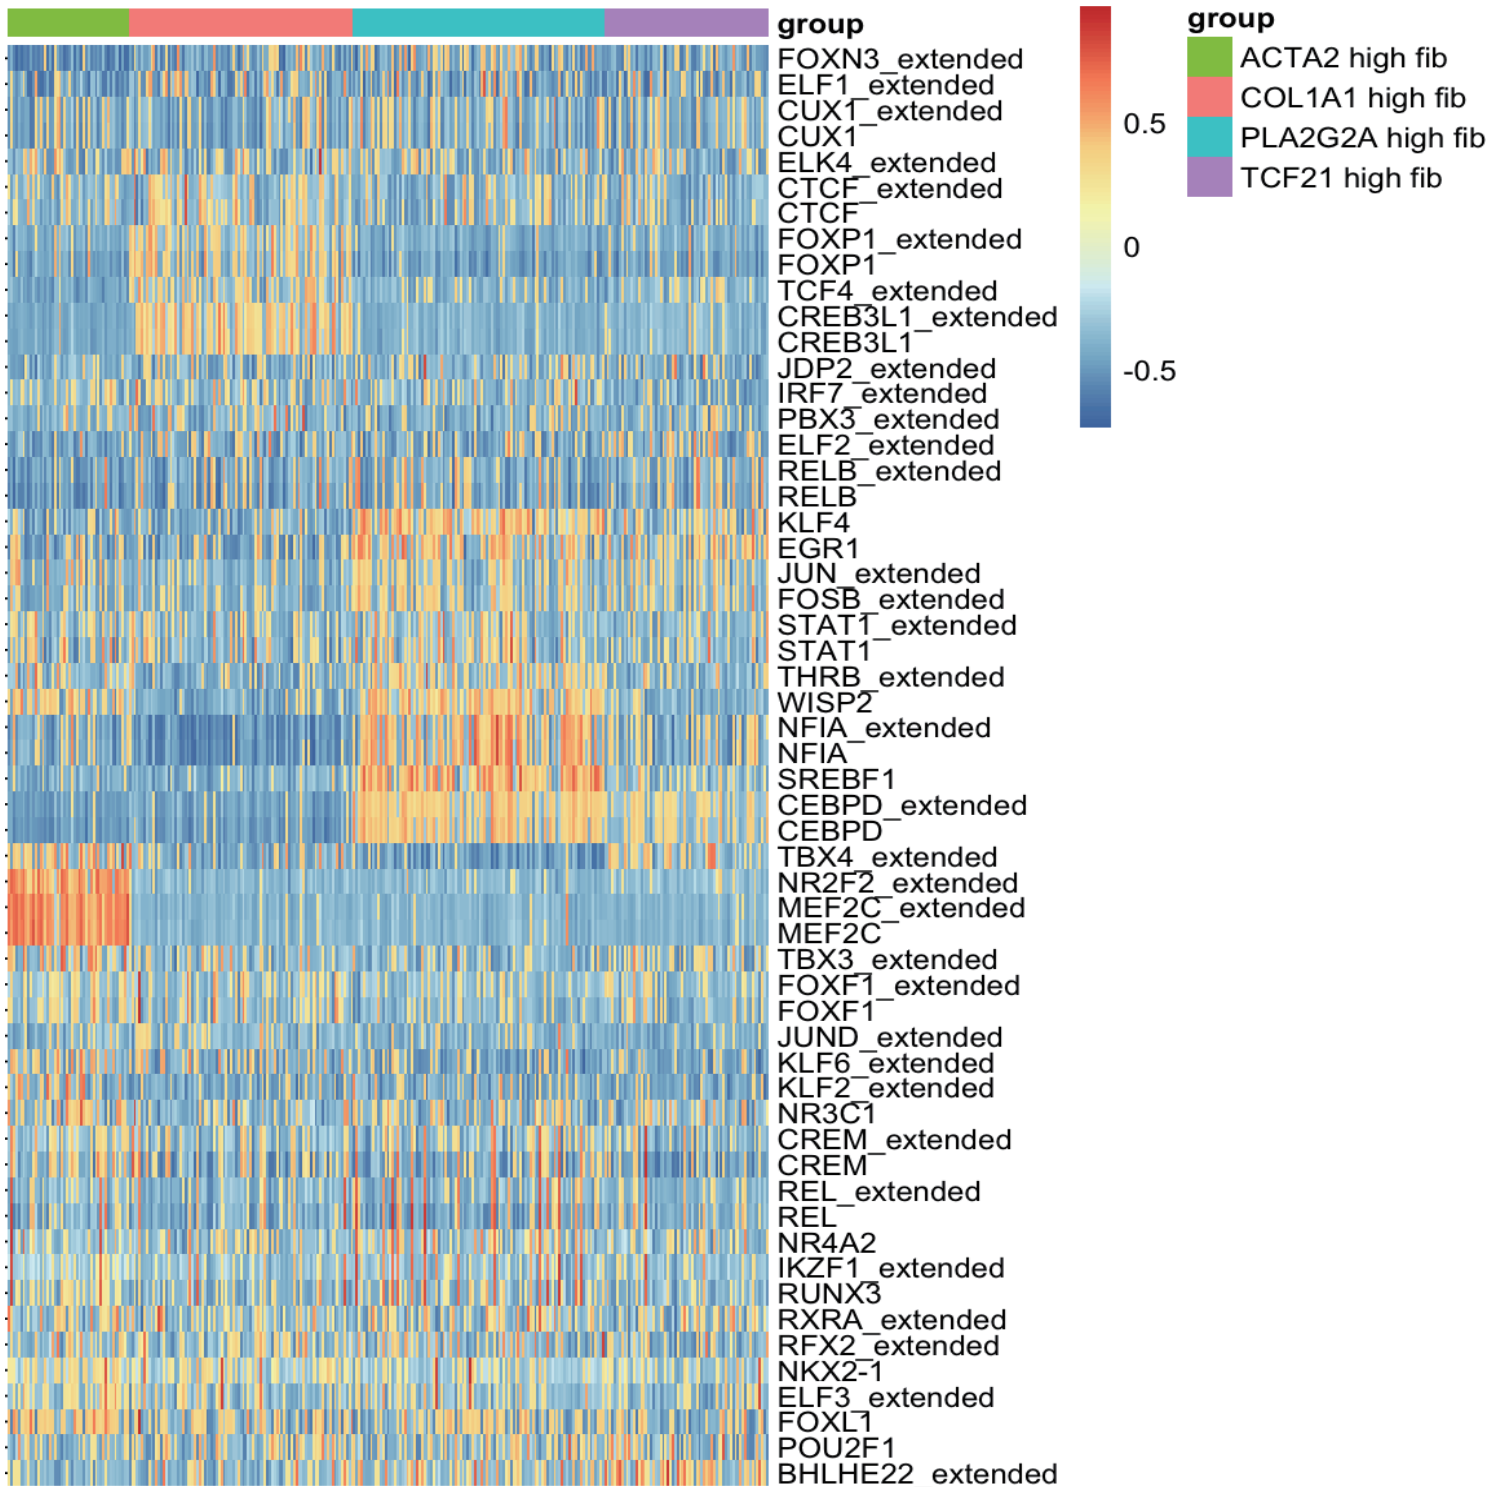

A

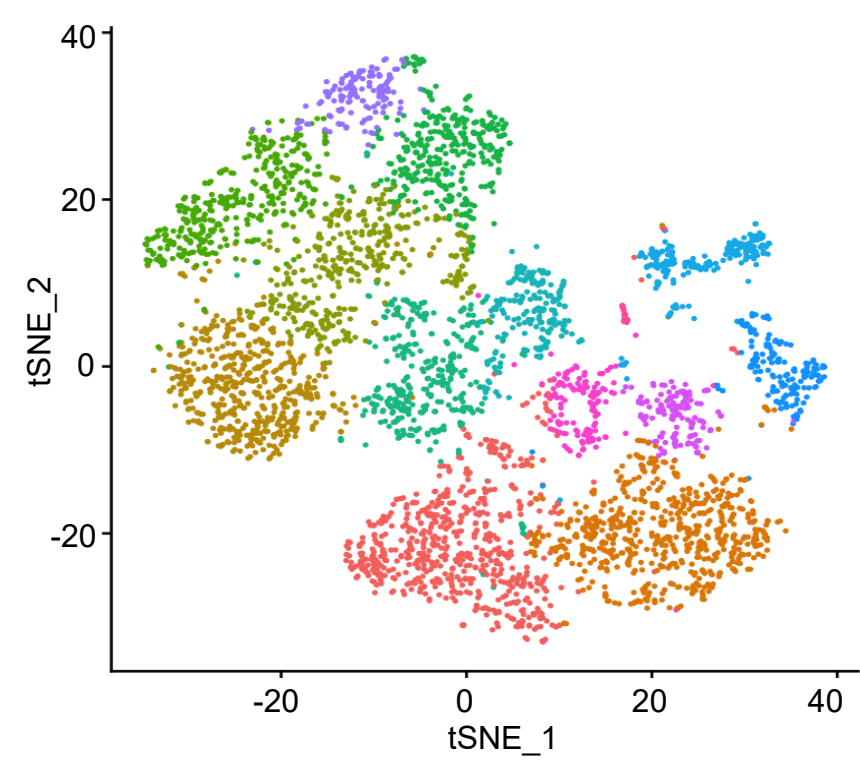

B

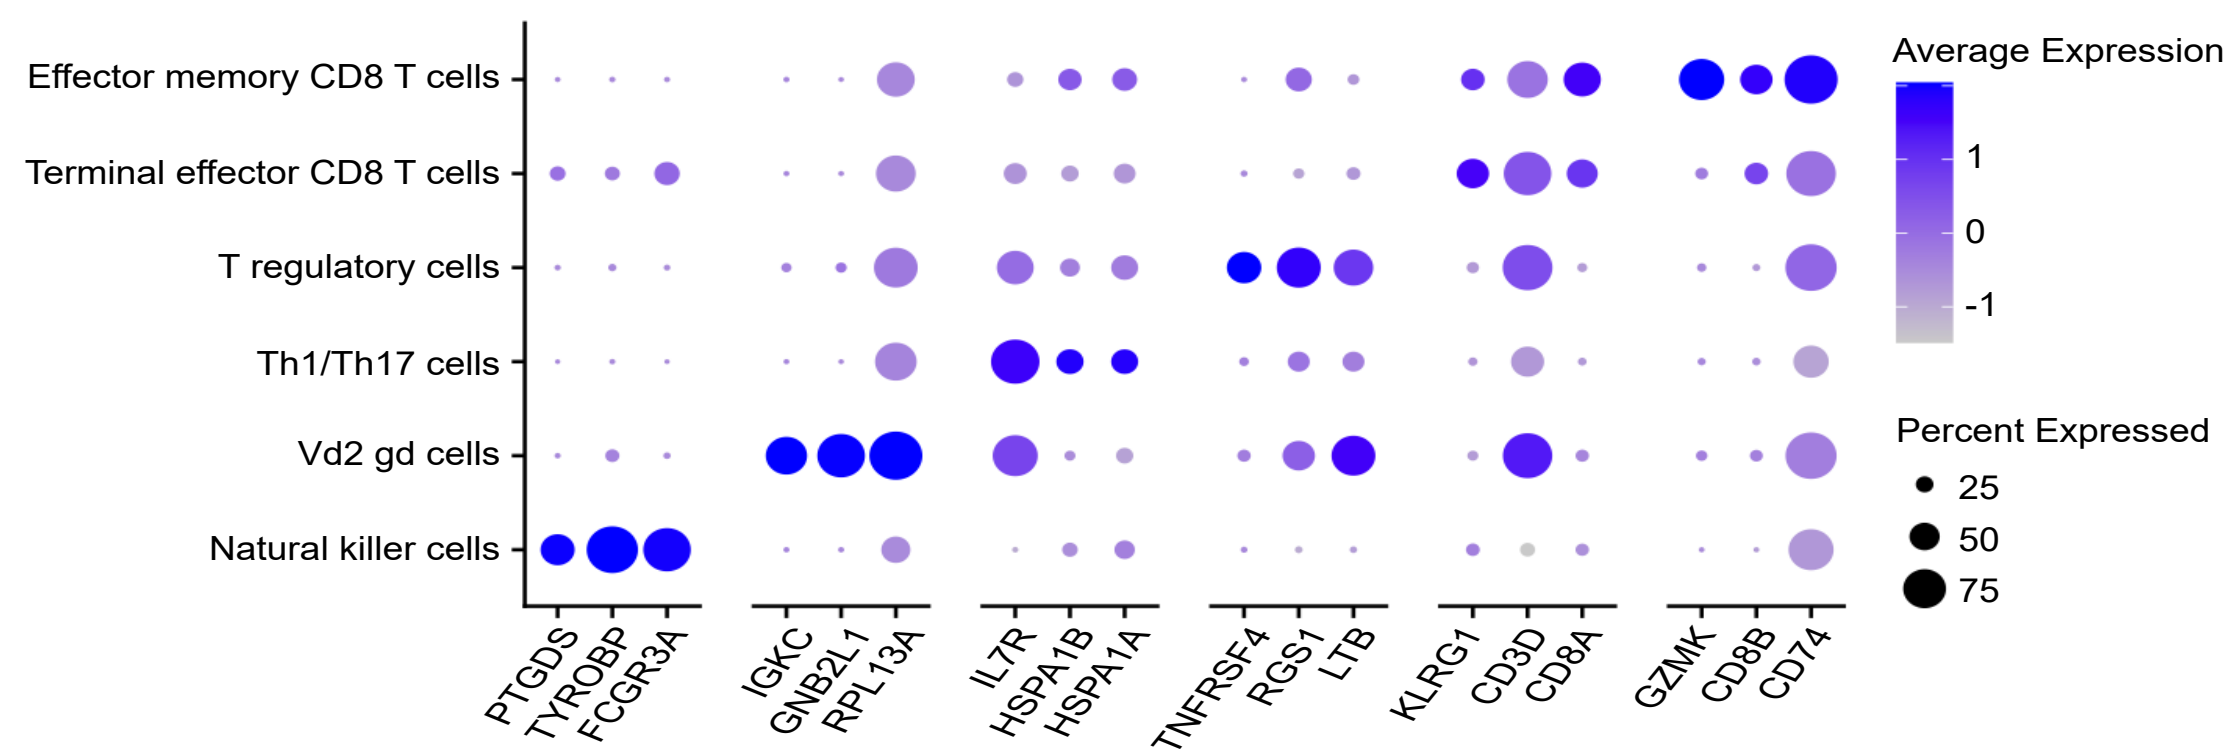

C

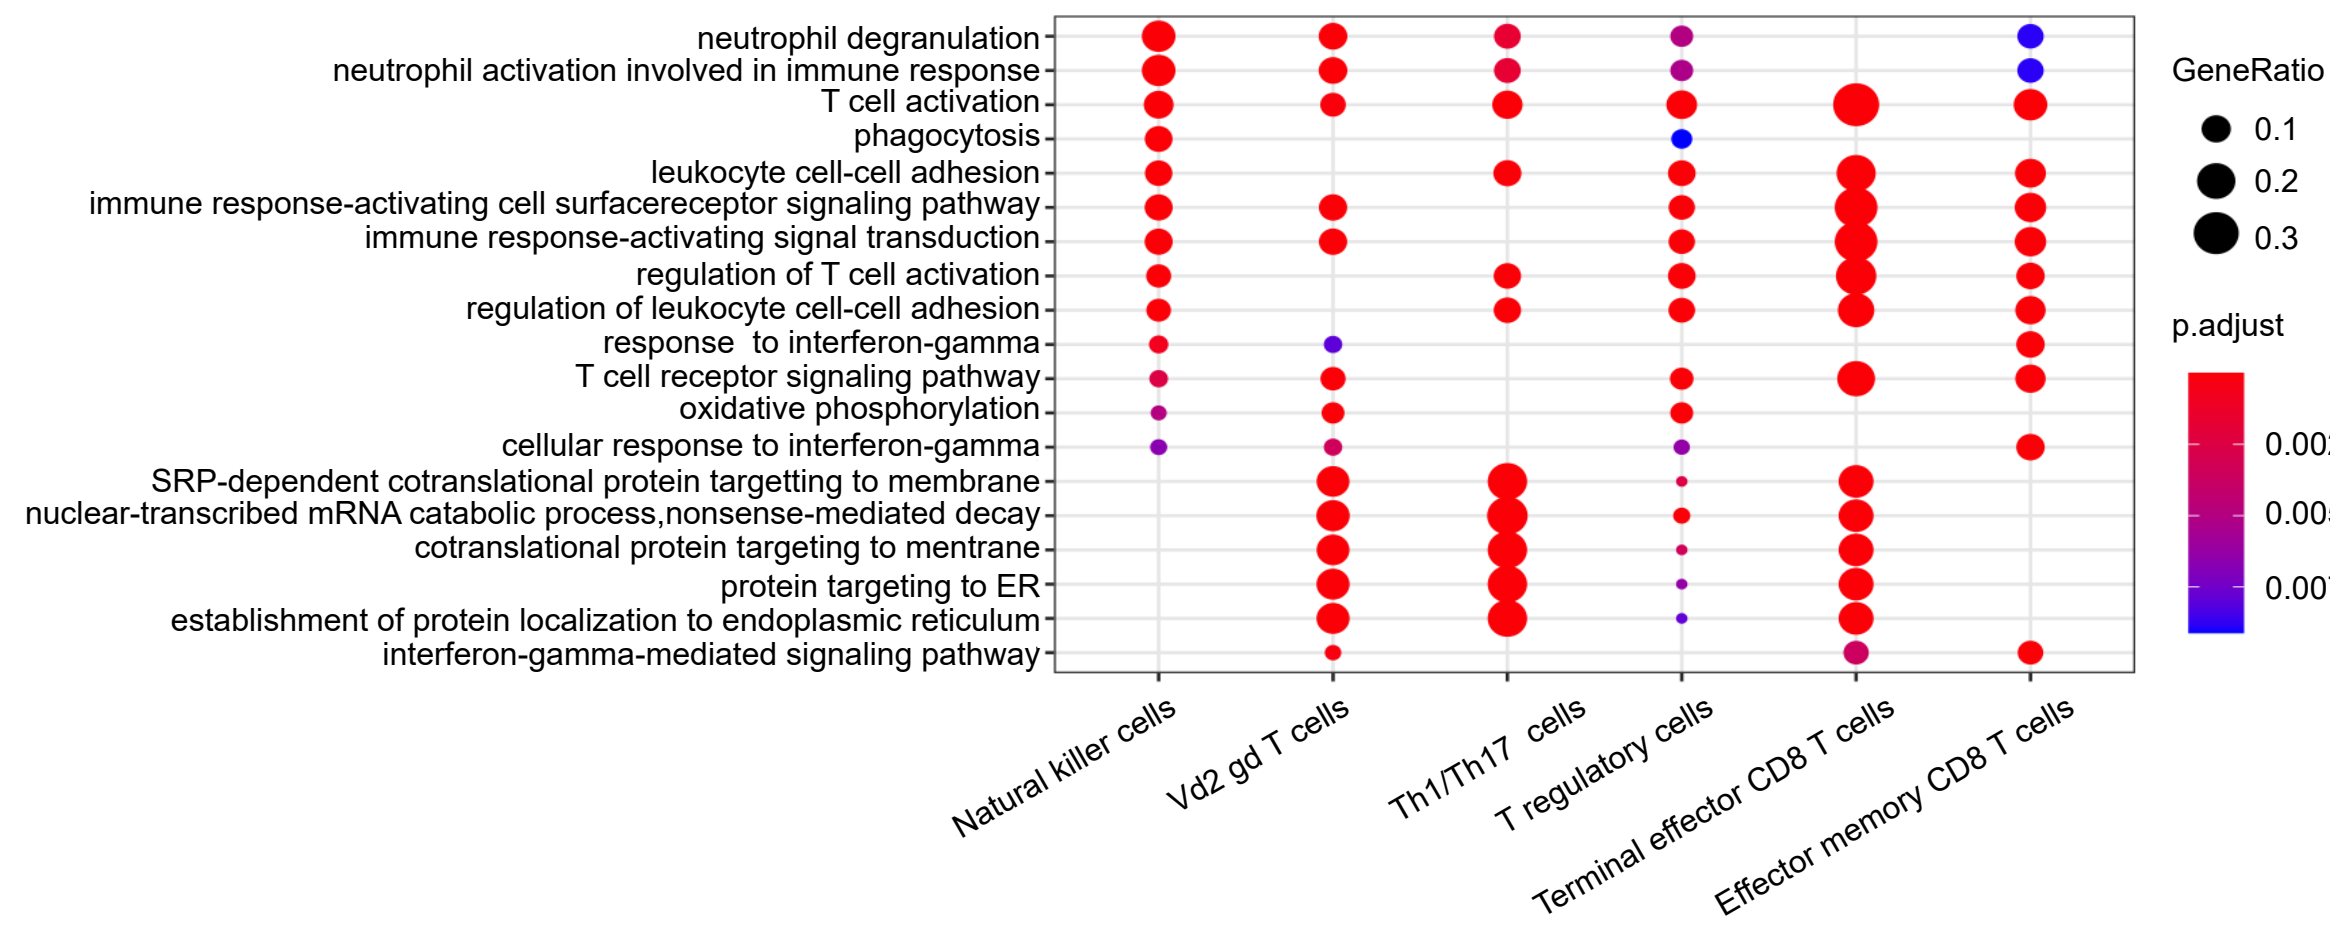

D

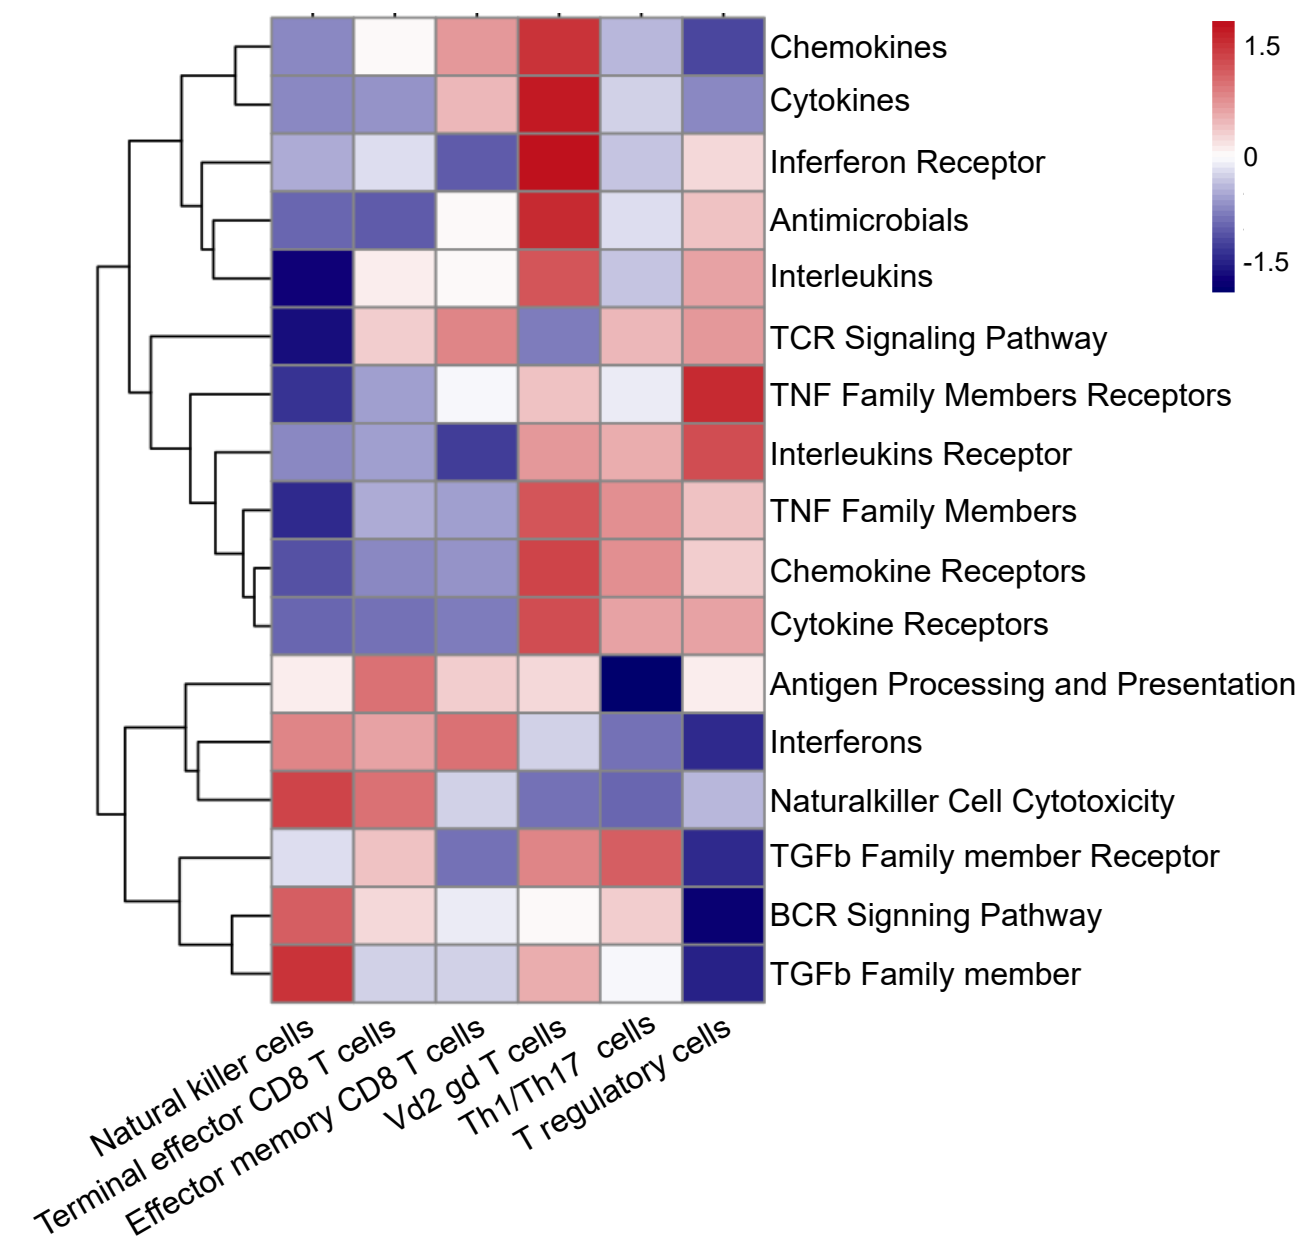

E

CD8+ T Cell Signature

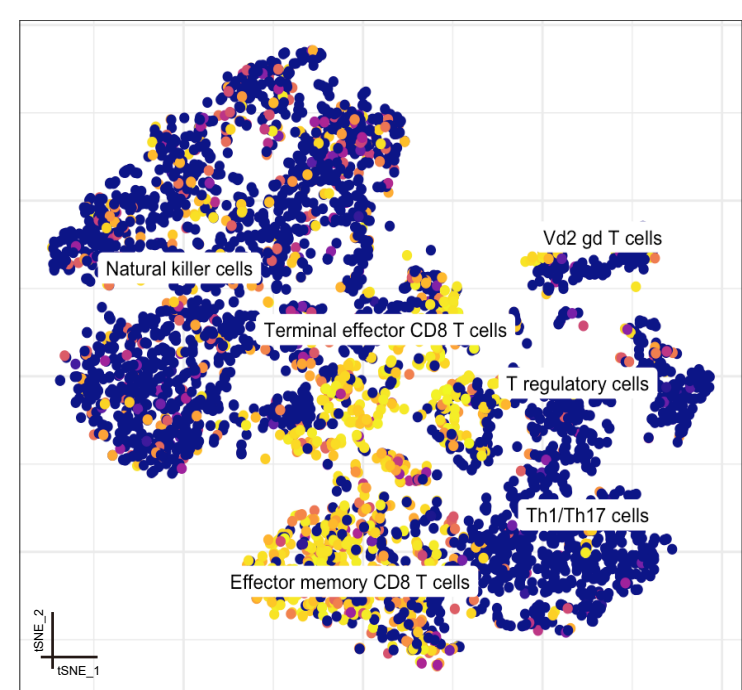

F

HLA Signature

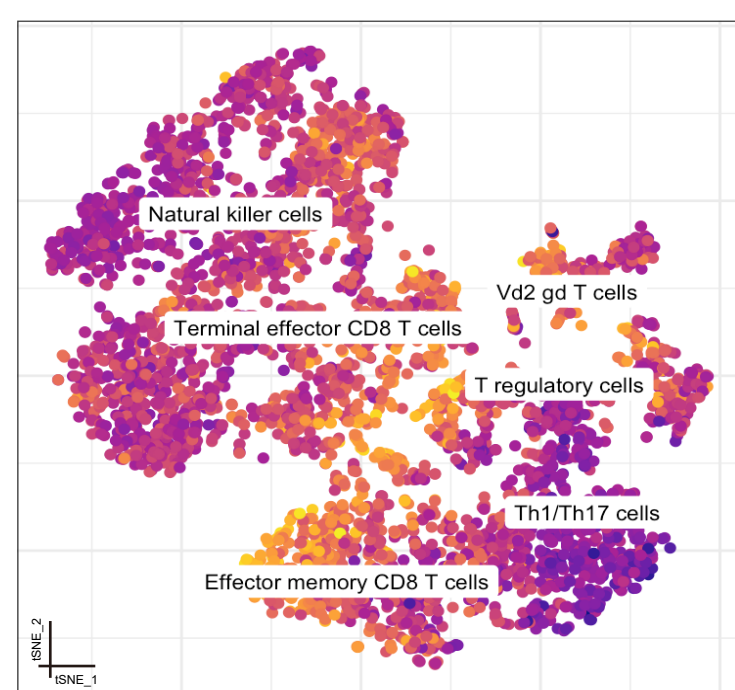

G

MHC-I Signature

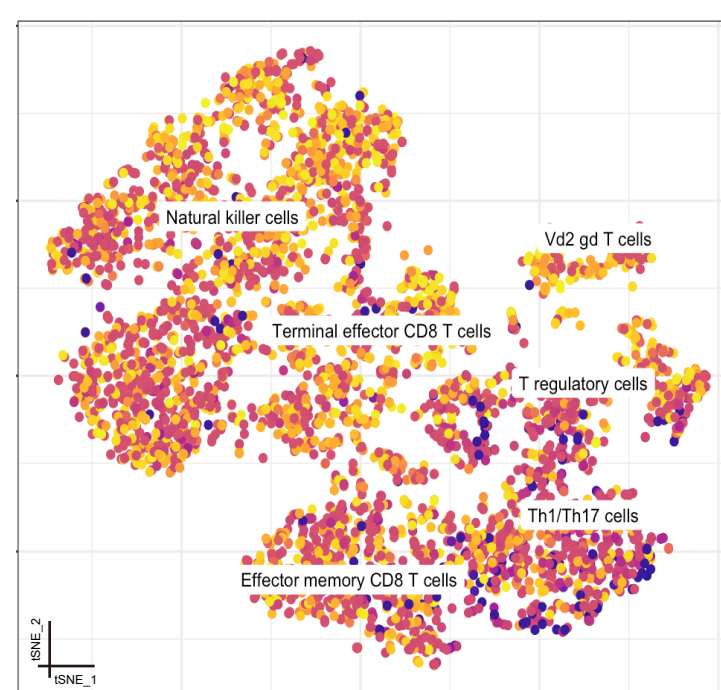

H

Cytokines/Chemokines/Receptors Signature

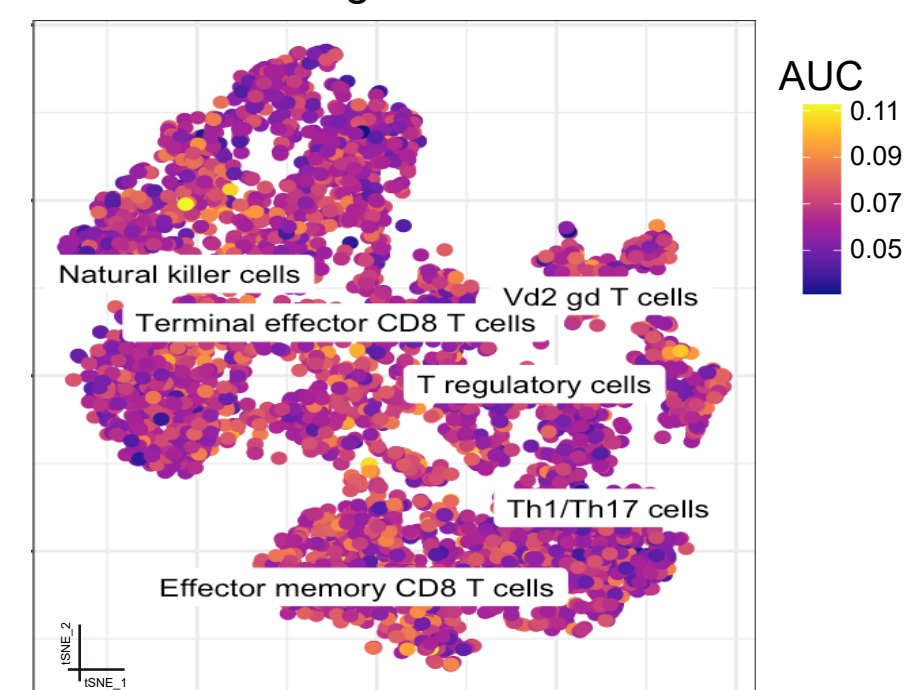

I

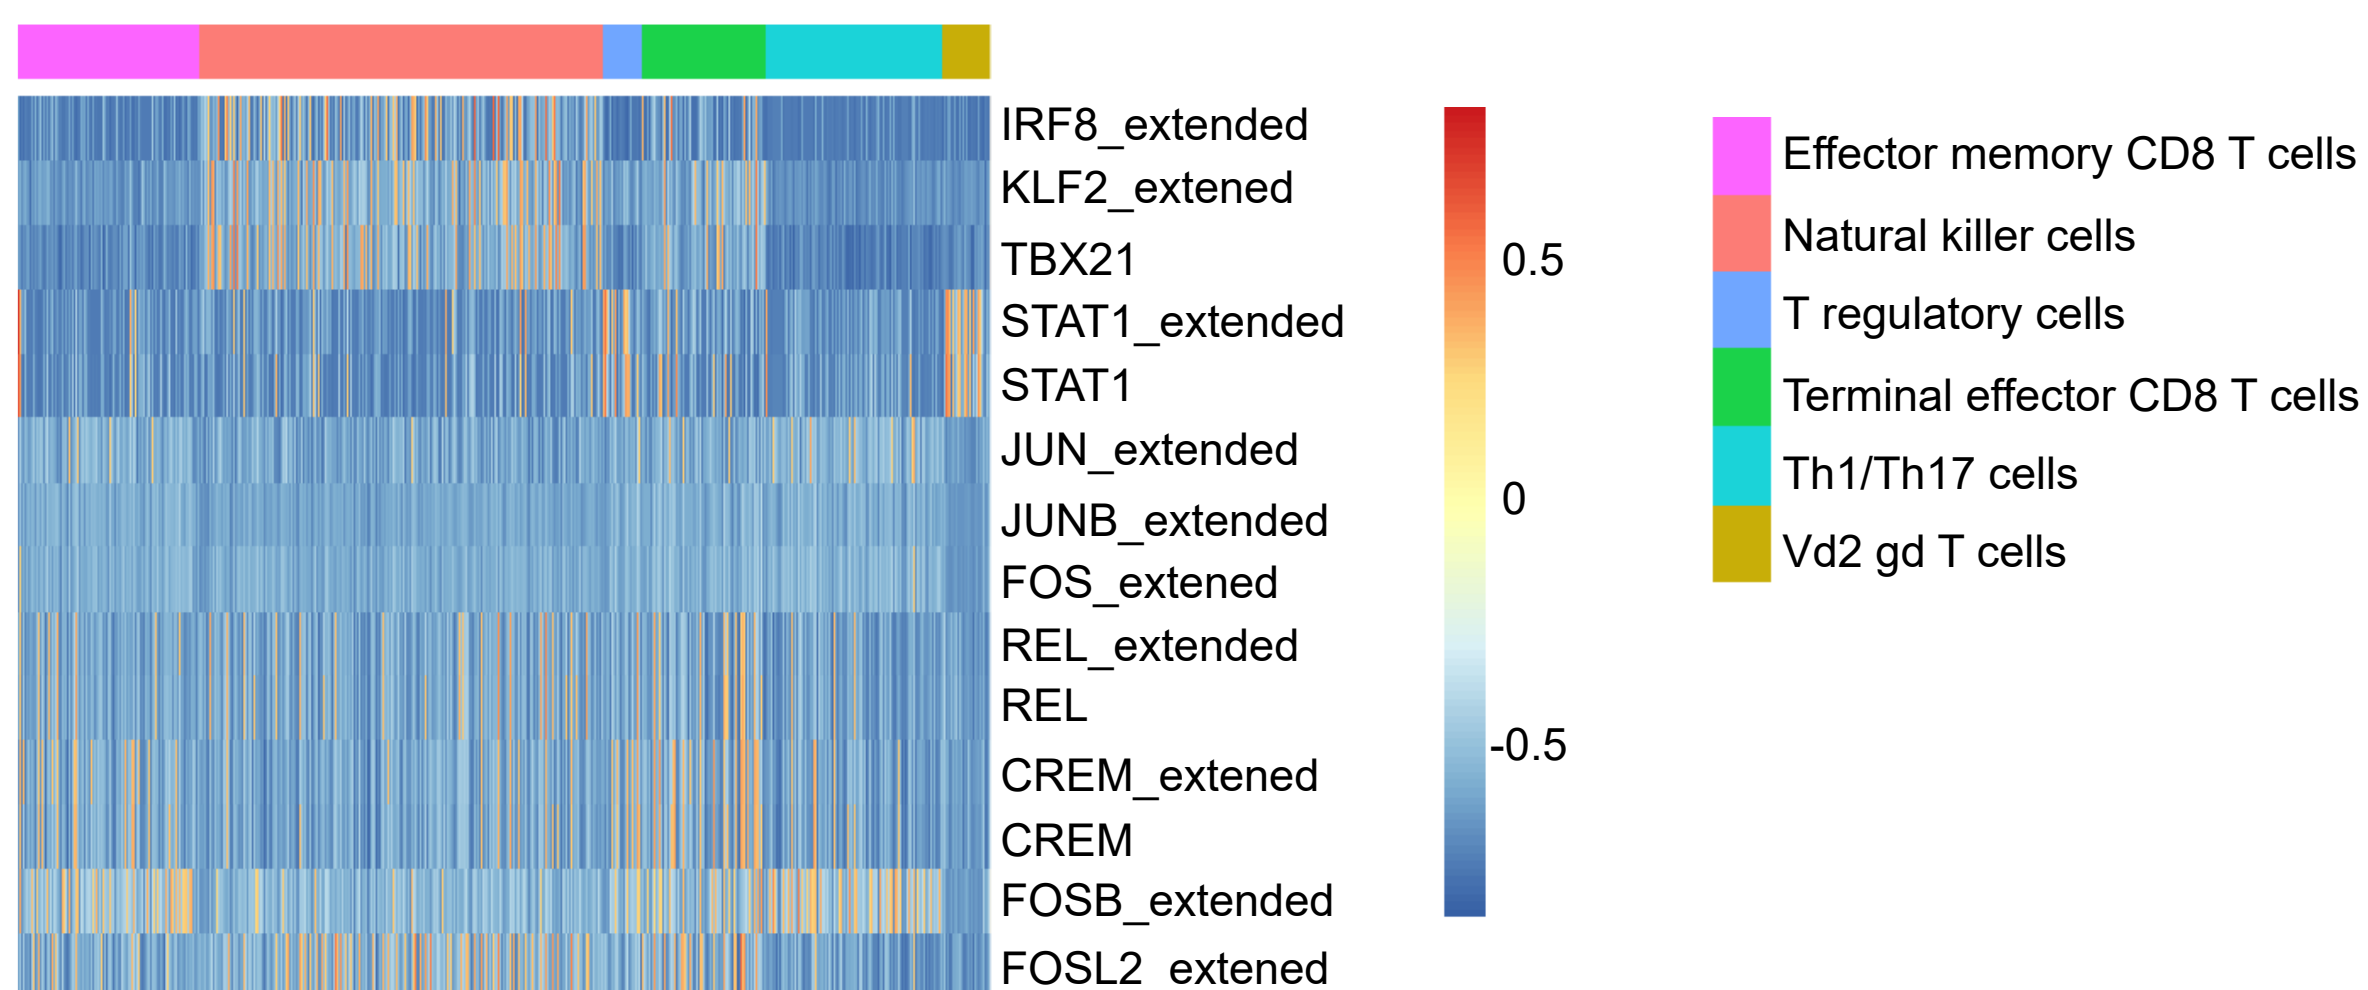

A

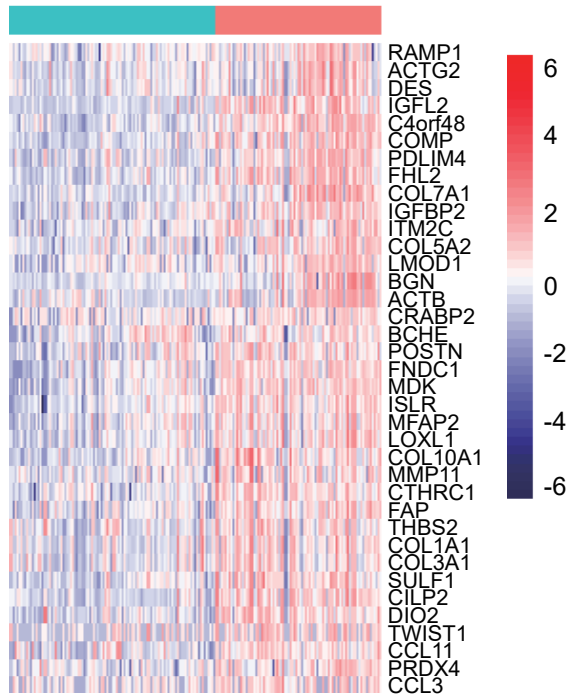

B

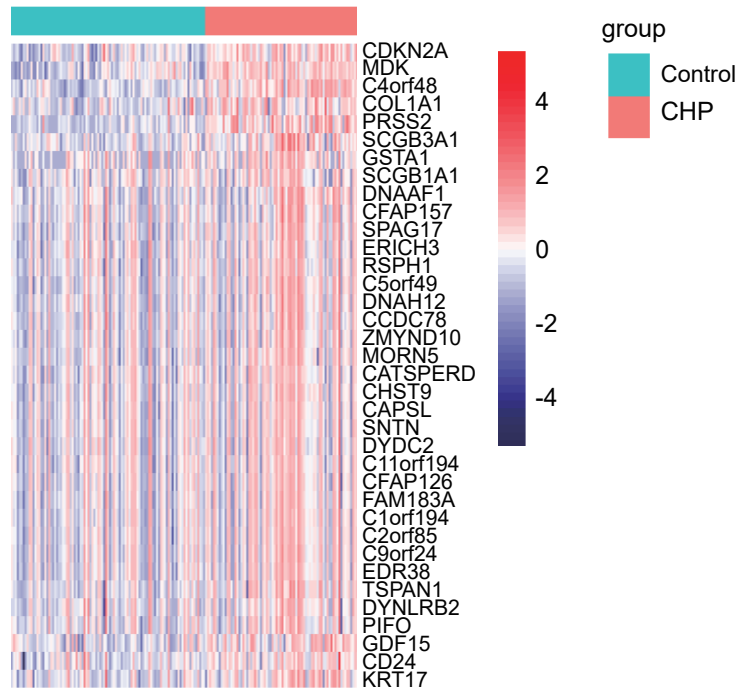

Supplement: 41420_2022_831_MOESM25_ESM.pdf [file 41420_2022_831_MOESM25_ESM.pdf]
